# Supplementary material for: The majority of transcripts in the squid nervous system are extensively recoded by A-to-I RNA editing
Source: eLife journal article supplement (doi:10.7554/elife.05198), 2015-01-08
Supplement: supp [file elife-05198-supp-v1.zip]

Archive with 10 entries (10 files):
- elife_poa_e05198_Figure_2_figure_supplement_2.pdf
- elife_poa_e05198_Figure_4_figure_supplement_3.pdf
- elife_poa_e05198_Figure_2_figure_supplement_1.pdf
- elife_poa_e05198_Figure_4_figure_supplement_1.pdf
- elife_poa_e05198_Supplementary_File_2.xlsx
- elife_poa_e05198_Figure_2_figure_supplement_5.pdf
- elife_poa_e05198_Figure_4_figure_supplement_2.pdf
- elife_poa_e05198_Figure_3_figure_supplement_1.pdf
- elife_poa_e05198_Figure_2_figure_supplement_4.pdf
- elife_poa_e05198_Figure_2_figure_supplement_3.pdf
