# Supplementary material for: The majority of transcripts in the squid nervous system are extensively recoded by A-to-I RNA editing
Source: eLife journal article supplement (doi:10.7554/elife.05198), 2015-01-08

**a**

**Clustering of the modification levels of A-to-G sites**

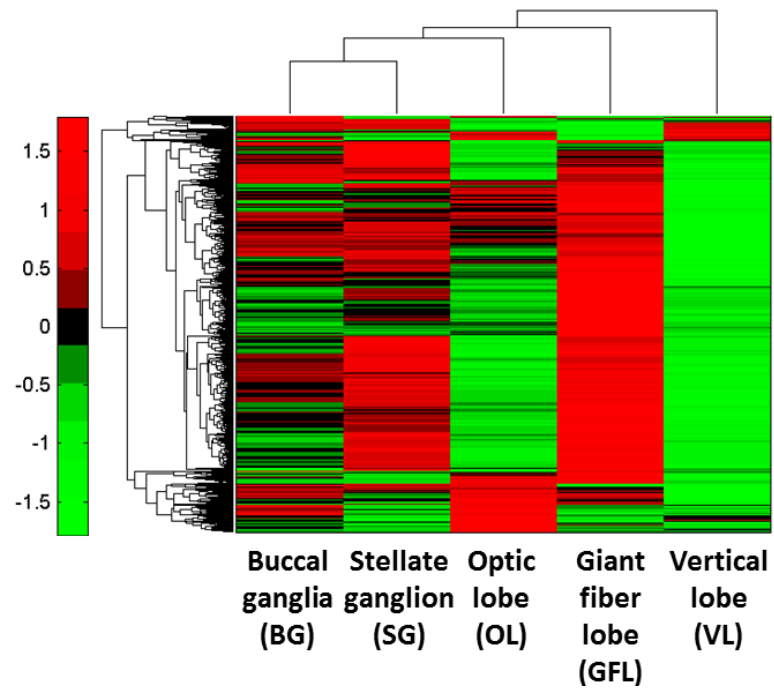

**b**

**Clustering of the modification levels of non A-to-G sites**

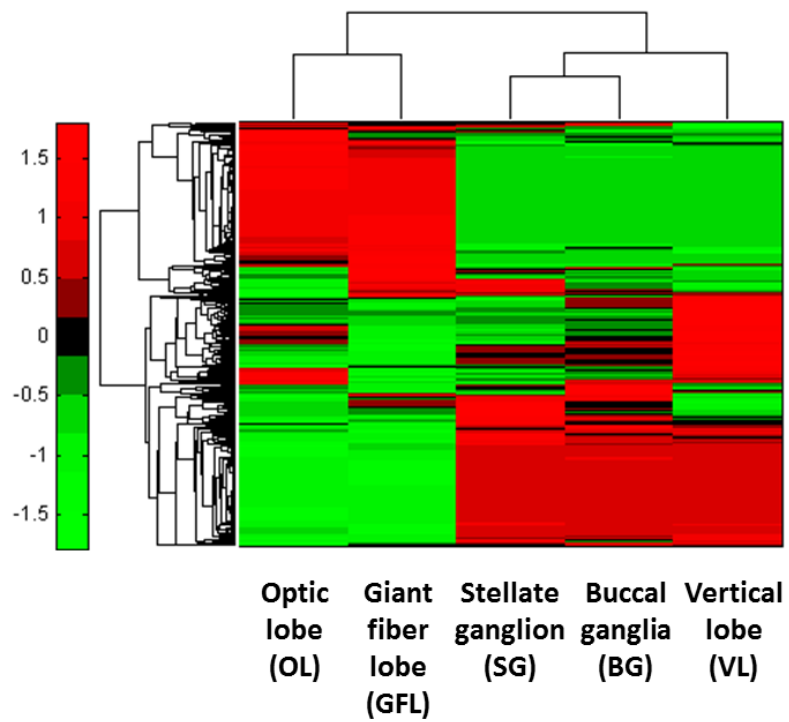

Supplement: supp [file elife-05198-supp-v1.zip › elife_poa_e05198_Figure_2_figure_supplement_2.pdf]
