# Supplementary material for: The majority of transcripts in the squid nervous system are extensively recoded by A-to-I RNA editing
Source: eLife journal article supplement (doi:10.7554/elife.05198), 2015-01-08
Supplement: supp [file elife_poa_e05198_Supplementary_File_2.xlsx]

## Sheet: TableA
Table A. Statistics of the human and macaque datasets analyzed using our detection procedure. The squid dataset is presented for comparison.
	Squid	Human blood31	Macaque brain32
DNA-reads	880Mx100bp	800Mx100bp	1083Mx90bp
RNA-reads	348Mx100bp	390Mx100bp	271Mx90bp
Trinity ORFs (with SwissProt hits)	12039	20734	14577
Total ORFs length	16493430	25367535	15326772
Weak non-AG sites	12403	5784	19019
Weak AG sites	81930	921	1765
% Weak AG sites	0.87	0.14	0.08
Strong non-AG sites	254	345	663
Strong AG sites	5649	46	129
% Strong AG sites	0.96	0.12	0.16

## Sheet: TableB
Table B. About half (15/33) of the validated editing sites in human blood sample31 and Macaque brain sample32 were identified by our detection procedure.
Organism	Positiona	Gene	Recoding Type	Detected by our analysis [yes/no]	Comments
Macaque	1:138950859	COPA	I>V	no	Low editing levels
Macaque	6:129544096	ARIH2	K>K	yes
Macaque	6:38781096	RICTOR	R>G	yes
Macaque	7:89331048	NOVA1	S>G	no	Low editing levels
Macaque	X:150275345	GABRA3	I>M	yes
Macaque	10:26945910	BLCAP	Y>C	yes	In vertebrate SwissProt
Macaque	10:26945919	BLCAP	Q>R	yes	In vertebrate SwissProt
Macaque	10:26945949	BLCAP	K>R	yes	In vertebrate SwissProt
Macaque	11:5028364	KCNA1	I>V	yes
Macaque	12:73754116	UNC80	S>G	yes
Macaque	17:24407704	COG3	I>V	no	Low editing levels
Macaque	5:72269698	IGFBP7	K>R	no	Not in Trinity transcriptb
Macaque	6:153684514	CYFIP2	K>E	yes
Macaque	X:152404069	FLNA	Q>R	no	Not in Trinity transcriptb
Macaque	11:47207718	ASIC1	T>A	no	Not in Trinity transcriptb
Macaque	7:54257914	NEIL1	K>R	no	Not in Trinity transcriptb
Macaque	7:54257915	NEIL1	K>K	no	Not in Trinity transcriptb
Macaque	5:149561914	GRIA2	Q>R	no	Not in Trinity transcriptc
Macaque	5:149561918	GRIA2	Q>Q	no	Not in Trinity transcriptc
Macaque	5:149585132	GRIA2	R>G	no	Not in Trinity transcriptc
Macaque	1:134852231	SMG5	R>G	no	Not in coding regiond
Macaque	3:13010093	SON	L>L	no	Low editing levels
Macaque	7:43601461	PDCD7	Q>R	no	Not in Trinity transcriptb
Macaque	2:78236903	FLNB	M>V	yes
Macaque	4:33833717	GRM4	Q>R	yes
Macaque	4:44072645	TMEM63B	Q>R	yes
Macaque	8:9841193	XKR6	R>G	yes
Human	4:57976234	IGFBP7	K>R	no	Not in Trinity transcriptc
Human	20:36147563	BLCAP	Q>R	yes	In vertebrate SwissProt
Human	20:36147572	BLCAP	Y>C	yes	In vertebrate SwissProt
Human	8:103841636	AZIN1	S>G	no	Poorly described by Trinitye
Human	5:156810359	CYFIP2	T>A	no	Not in Trinity transcriptc
Human	19:42804352	PAFAH1B3	N>D	no	Poorly described by Trinitye
a the macaque data is from Chen et al.32 and the human data is from Chen et al.31
b the Trinity transcript do not include the region of the editing position
c no Trinity transcript for this gene
d the mentioned genomic position is not inside SMG5 coding region, which probably means that Chen et al.32 were referring to a different position
e two different Trinity transcripts with almost the same sequence were not correctly resolved as two isoforms of the same gene

## Sheet: TableC
Table C. Primers used for the Sanger validation experiments in 19 ORFs.
SwissProt name	Trinity name	Forward gDNA primer	Reverse gDNA primer	Forward cDNA primer	Reverse cDNA primer
SYIC_HUMAN	comp124896_c0_seq1	5'TCTTTCACCTGTTTCACAAGCTC3'	5'TGCGGTATGACAGCAAATGAAG3'	5'AGATTGGATCTGTTTCACAAGCTC3'	5'TGCGGTATGACAGCAAATGAAG3'
PCLO_CHICK (piccolo)	comp136336_c0_seq4	5'CAGTTGGGCCACACAGTCTAC3'	5'TTCTTACCTGGTGTGGATGCTG3'	5'CAGTTGGGCCACACAGTCTAC3'	5'ATCAGGATGCTGGTGTGGATG3'
SYNE1_HUMAN (Nesprin-1)	comp136402_c0_seq3	5'TGTGTTTACCTGACACCTGTGG3'	5'TTGTGTGATGAGCAGGTGGAG3'	5'GATACCTGCAGATCCTGACACC3'	5'TTGTGTGATGAGCAGGTGGAG3'
AKAP9_MOUSE	comp136405_c0_seq4	5'CAACACCACAAGGCTATCGTG3'	5'CCTGTCGAACTAATGACCACAC3'	5'CCGAGTCCAAAGAATGGGAATG3'	5'CCTGTCGAACTAATGACCACAC3'
GGA3_MOUSE	comp131559_c0_seq5	5'CATCTCAAGCAGGCACCAATG3'	5'AAACACTTACACAGCTGACACC3'	5'CATCTCAAGCAGGCACCAATG3'	5'CTTGATGACACAGCTGACACC3'
APH1_DROME*	comp112340_c0_seq1	5'TGCATTTCAGACTTACCTCAATGG3'	5'CTTTGAATGCCAGCGTTCCC3'	5'GTTGTGGCCAGTCACATGTTC3'	5'CTTTGAATGCCAGCGTTCCC3'
SRAC1_DANRE	comp128266_c0_seq1	5'TGCGGTTCTGGTGTCTATCTG3'	5'ATGACCTACCCAAACGTGCAG3'	5'TGCGGTTCTGGTGTCTATCTG3'	5'AAATCATCCAAACGTGCAGAAGG3'
MF2NB_DROME	comp129381_c0_seq3	5'GGAGTGTCAGCTACCTCAGTG3'	5'AGCAGCTGAGTACATTATTTCACC3'	5'GGAGTGTCAGCTACCTCAGTG3'	5'TCTGTTGTGGAACCAAAGTGC3'
SRC42_DROME	comp123751_c1_seq2	5'TGTTGGACGCTCCATCTCTTC3'	5'TTTCCTTTCAGGTATGACCAATGC3'	5'TGTTGGACGCTCCATCTCTTC3'	5'ACCATATCCAGGTATGACCAATGC3'
CLA1B_XENLA	comp135943_c0_seq1	5'GTTGCTCAGTTCACCCTGAAG3'	5'ATAACAGAGCTTACTGGCATTTCG3'	5'GTTGCTCAGTTCACCCTGAAG3'	5'ATTCAGAAACCAGGGCACATTC3'
ACHA9_CHICK†	comp131790_c1_seq2	5'TCTTCTTCTTCCAGTGCGGATG3'	5'CTTGCATTCTTGTTCGTCAAATGG3'	5'ACAACTATGCGGATGAAAGAGTG3'	5'CTTGCATTCTTGTTCGTCAAATGG3'
GLRA4_MOUSE†	comp134739_c0_seq3	5'AGGTCCTACAACAGGTCGTTC3'	5'AATACATACCATGTCGTTCTTGCC3'	5'AGGTCCTACAACAGGTCGTTC3'	5'TGGGTTCAGCTTCTACATCTGG3'
SCN2A_HUMAN	comp136145_c2_seq5	5'AATCTTGGCACTGGCTCCAC3'	5'ACACTTACCAATCTGAATGAACGC3'	5'AATCTTGGCACTGGCTCCAC3'	5'CACGGAGCAATCTGAATGAACG3'
ABHD8_XENLA	comp135467_c0_seq4	5'ACACTGATCCAACTGTGGTAGAC3'	5'CCCGATTTAATTGCAGGTCAGC3'	5'ACACTGATCCAACTGTGGTAGAC3'	5'ACCAGGTCTTTGAGAAGTCAGC3'
DEN1A_XENLA	comp134587_c0_seq3	5'TCTCTTTCCCTTGTTGTTGATGTC3'	5'TTGCGAACCCAGAAGTTAAGTG3'	5'GACGGTGTATGACTCCCACTC3'	5'TTGCGAACCCAGAAGTTAAGTG3'
EPG5_DANRE	comp136362_c0_seq5	5'ATGTGTTGTGCGACATCTCTATG3'	5'GTGAACTTACCGAGAAAGCTGTG3'	5'ATGTGTTGTGCGACATCTCTATG3'	5'CTACTTGTAACCGAGAAAGCTGTG3'
TBD2B_XENTR	comp136333_c0_seq1	5'CACTTACCTCGTTGAGTTGATGG3'	5'TTGATCGGGAAGAATGTGATGC3'	5'CAGCTGTGTCTCGTTGAGTTG3'	5'TTGATCGGGAAGAATGTGATGC3'
GDE_RABIT	comp135493_c0_seq1	5'CATCCCGGCACTTTACAAACC3'	5'TGCCGGCATGGATTATTTGTTG3'	5'CATCCCGGCACTTTACAAACC3'	5'TGGGCTTGACAGCTTGGATG3'
GIDRP_MOUSE	comp134214_c0_seq1	5'ACACTCACCTCTTCCATGACG3'	5'CAGGAGCGGACCATTCTATCG3'	5'AGTAGTCAGCTCTTCCATGACG3'	5'CAGGAGCGGACCATTCTATCG3'
*Poor sequencing quality of cDNA sequences.
†Poor sequencing quality of gDNA sequences.

## Sheet: TableD
Table D. 40 editing sites validated using Sanger sequencing.
SwissProt name	Trinity name	Location inside Trinity sequence	Editing levels measured using HiSeq* [%]	Editing levels measured using Sanger sequencing†,‡ [%]
SYIC_HUMAN	comp124896_c0_seq1	751	48	55
SYIC_HUMAN	comp124896_c0_seq1	761	67	70
PCLO_CHICK (piccolo)	comp136336_c0_seq4	5913	68	37
PCLO_CHICK (piccolo)	comp136336_c0_seq4	5914	90	59
PCLO_CHICK (piccolo)	comp136336_c0_seq4	5936	94	96
SYNE1_HUMAN (Nesprin-1)	comp136402_c0_seq3	3541	41	30
SYNE1_HUMAN (Nesprin-1)	comp136402_c0_seq3	3547	79	70
SYNE1_HUMAN (Nesprin-1)	comp136402_c0_seq3	3560	48	59
AKAP9_MOUSE	comp136405_c0_seq4	9061	79	68
AKAP9_MOUSE	comp136405_c0_seq4	9063	21	16
AKAP9_MOUSE	comp136405_c0_seq4	9083	58	32
GGA3_MOUSE	comp131559_c0_seq5	1717	51	50
GGA3_MOUSE	comp131559_c0_seq5	1720	79	77
APH1_DROME	comp112340_c0_seq1	Poor sequencing quality of cDNA sequences
SRAC1_DANRE	comp128266_c0_seq1	378	30	40
SRAC1_DANRE	comp128266_c0_seq1	387	45	52
SRAC1_DANRE	comp128266_c0_seq1	409	21	27
SRAC1_DANRE	comp128266_c0_seq1	410	29	46
MF2NB_DROME	comp129381_c0_seq3	875	28	22
MF2NB_DROME	comp129381_c0_seq3	919	55	59
MF2NB_DROME	comp129381_c0_seq3	920	73	63
SRC42_DROME	comp123751_c1_seq2	251	82	92
SRC42_DROME	comp123751_c1_seq2	252	82	87
CLA1B_XENLA	comp135943_c0_seq1	3357	91	100
CLA1B_XENLA	comp135943_c0_seq1	3369	66	73
ACHA9_CHICK	comp131790_c1_seq2	Poor sequencing quality of gDNA sequences
GLRA4_MOUSE	comp134739_c0_seq3	Poor sequencing quality of gDNA sequences
SCN2A_HUMAN	comp136145_c2_seq5	3232	97	96
SCN2A_HUMAN	comp136145_c2_seq5	3233	42	20
ABHD8_XENLA	comp135467_c0_seq4	5234	47	37
ABHD8_XENLA	comp135467_c0_seq4	5236	87	83
ABHD8_XENLA	comp135467_c0_seq4	5269	37	36
DEN1A_XENLA	comp134587_c0_seq3	1294	78	80
DEN1A_XENLA	comp134587_c0_seq3	1348	37	65
EPG5_DANRE	comp136362_c0_seq5	1680	39	58
EPG5_DANRE	comp136362_c0_seq5	1681	68	70
TBD2B_XENTR	comp136333_c0_seq1	4975	44	31
TBD2B_XENTR	comp136333_c0_seq1	5031	37	38
GDE_RABIT	comp135493_c0_seq1	6241	42	42
GDE_RABIT	comp135493_c0_seq1	6248	78	74
GIDRP_MOUSE	comp134214_c0_seq1	658	96	96
GIDRP_MOUSE	comp134214_c0_seq1	678	29	15
GIDRP_MOUSE	comp134214_c0_seq1	684	78	87
*Editing levels refer to the GFL tissue as the Sanger validations were performed in GFL tissue.
†Estimated by measuring the heights of the A and G in the resulting chromatograms.
‡In all the sites tested, no traces of G appear in the gDNA chromatograms.

## Sheet: TableE
Table E. Primers used for the MiSeq validation experiments in 60 ORFs.
SwissProt name	Trinity name	Forward gDNA primer (from 5' to 3')	Reverse gDNA primer (from 5' to 3')	Forward cDNA primer (from 5' to 3')	Reverse cDNA primer (from 5' to 3')
ANS1A_MOUSE*	comp131042_c2_seq10	AGTGAAGTTTCTGACCTCTCTGCGGA	AACCTTCGTCCATCGACTGTGATG	TGAATGTGCTTACCCTCTCTGCGGA	AACCTTCGTCCATCGACTGTGATG
CPEB2_MOUSE*	comp129184_c2_seq1	CTTCTTCTTCAGTGGAGTTGGCTAT	GCAATGTAACTCTGCTGGTTGGAGA	TCTTCGGGCATTGGAGTTGGCTA	GCAATGTAACTCTGCTGGTTGGAGA
CUBN_RAT*,§	comp132764_c0_seq9	AAGTGGCTCAGTGTGGCATAGGCC	TGTGACAGGACCTGATTTACCTCAAT	AAGTGGCTCAGTGTGGCATAGGCC	TGTGACAGGACCTGATTTACCTCAAT
SC23A_MOUSE*	comp131810_c0_seq1	GTCTAACACCAACCTGTATCTGC	TGTCCCTCAGTTTGCTTCCTCCCA	GCCCAATACCCAACATTTCCTGTAT	TGTCCCTCAGTTTGCTTCCTCCCA
SPON1_CHICK*	comp126471_c0_seq1	TCCCTGGTCAGATTGGACAACCTG	ATTGTGCTTACGGCATTTGGCGAT	TCCCTGGTCAGATTGGACAACCTG	GCCACTCAGACATCTTACAATCGACG
TRABD_BOVIN*	comp119426_c0_seq1	AGAGAGAGACTTACCACTTTCTGGATC	TGAACCAATTGAAAGCAGATCCCATG	TCTGACTCATCACCACTGTATGTCAC	TGAACCAATTGAAAGCAGATCCCATG
SRSF7_HUMAN*,§	comp135290_c0_seq2	GTTGCGCGAAATCCACCTGGAT	CTACACGGACTCTTCGACCACAAA	GTTGCGCGAAATCCACCTGGAT	CTACACGGACTCTTCGACCACAAA
ZMIZ1_MOUSE*	comp135673_c2_seq4	AACCGTCAGTGTCAATGCAACACC	ATGACAGCAAGAGGACAGGTGAGA	AACCGTCAGTGTCAATGCAACACC	CTTGGTCGATGGACAAGTTGAAGGAC
NEC1_HUMAN*	comp130950_c0_seq2	TCTCTGTCATTGCAGGTGTGCGTT	CCGGTCCATCAAGGGTCATACCAT	CTCTAGGATCGGAGGTGTGCGTT	CCGGTCCATCAAGGGTCATACCAT
ILF2_PONAB*,§	comp80011_c0_seq1	ATGTGGCCTTCAGACGTTGTCTCC	AAGCAAACTTGATCCTGCTGTTCTAA	ATGTGGCCTTCAGACGTTGTCTCC	AAGCAAACTTGATCCTGCTGTTCTAA
TBCD_BOVIN*	comp132714_c0_seq1	CTTTGATTGTAGTGTGGGTCGTGTAA	CATGCCAAGCTGCATCTCC	GTCTGCTGCCAAAGGTGTGGGT	CATGCCAAGCTGCATCTCC
DEPD5_HUMAN*	comp134663_c6_seq10	TCCCTACAGATCCCAGTGGAGCAG	AAACGCGTACCACACTTTCAGATC	TCCCTACAGATCCCAGTGGAGCAG	GTGCTGGCCACACTTTCAGATC
NDUB5_MACFA*	comp129957_c2_seq1	ACTTTACCTACCTTCGTTGGAGACTCC	AAACATGGTGGTTCTGAGTGCGTT	GTGTCGGACAACTTCGTTGGAGA	AAACATGGTGGTTCTGAGTGCGTT
KCNAS_DROME*	comp122754_c0_seq2	GGCTTAGTGTACGGGTTTGTGTTT	TTCTTTCTCTTTGCAGGTCTCTTG	GGCTTAGTGTACGGGTTTGTGTTT	CTGGATACGGAACTAACGCAAGGATA
RGRF2_DANRE*,§	comp135674_c1_seq2	ATCTTCGTCGGTGACTATGCCCCA	GATCCAGAAGGCGTTCAACTGTGG	ATCTTCGTCGGTGACTATGCCCCA	GATCCAGAAGGCGTTCAACTGTGG
DUS23_MOUSE*	comp48319_c0_seq2	ACTTTCTGATCTCTTCCAGTCTCGTGT	GATAGGGTAGTGGCAGCAGTCGAC	TGCCGACCATATTATGTCATTCAGAAT	GATAGGGTAGTGGCAGCAGTCGAC
SC6A9_XENLA*	comp129558_c0_seq1	CTACCCTAGATGGGCGAAAGCTAT	CGGCTGTTGTACTCACGTAATATCCTC	CTACCCTAGATGGGCGAAAGCTAT	ACTGAGGACGTAATATCCTCCTTGTGT
WDFY3_HUMAN*	comp136330_c0_seq1	GTCCAACCTGCTTTGGAATCTGTCC	AGCCGTGGACGCTACTAATGTGT	TAAACAGCTGCTTTGGAATCTGTCCAA	AGCCGTGGACGCTACTAATGTGT
HERC1_HUMAN*	comp135337_c4_seq1	AGGCGGAGCAGAACCATTTACATC	TCTCTTTGCAGGAATGTGATTGCTTG	AGGCGGAGCAGAACCATTTACATC	GACTGCTCTTCCTACTGACAGGAAT
MSH3_HUMAN*	comp135239_c0_seq2	AGTTTCCCGCCATTGTAGAGCAAA	CTTCGATCAGAAACTCAACACCTGAAA	AGTTTCCCGCCATTGTAGAGCAAA	CTTCGATCAGAAACTCAACACCTGAAA
MLL1_HUMAN†	comp135801_c1_seq2	AGAAATCCTCACATTGCCATCAACTTT	GTCCTGCCAATTTCCACTTCCT	CTGCGGATTACGTCAAAGTCG	GTCCTGCCAATTTCCACTTCCT
NR3BA_DANRE†	comp136183_c8_seq13	GCAGCTGCCAATAATTCCAGAGTGA	TGCTACTTACTCGTACTCCCATTGTTG	GCAGCTGCCAATAATTCCAGAGTGA	AGATGGTGTTTGGCGAGGAGTGA
TAU_CAPHI†	comp132068_c0_seq30	GAGCATGTGCTAATGGTAGCTGTTG	GTGACGGTGAAGAAGGAGGAGATG	GGGTGGAGGAGCTGTAAAGATTGAAT	GTGACGGTGAAGAAGGAGGAGATG
TOP2B_CHICK†	comp134825_c7_seq1	TTTGTAGGCCTCCCTAATGGGTAC	GAATACGGGTTCCAAACTGACCAAT	ATGGTGAAGCCTCCCTAATGGGTA	GAATACGGGTTCCAAACTGACCAAT
AGO2_RABIT†	comp125420_c1_seq1	CTCCTGTTCAGGTGCTGAGTCATG	TCGTGTGTGATGCCTCTTCTGCAC	GTTAGTGAGGGCCAGTTCCAGCAA	TCGTGTGTGATGCCTCTTCTGCAC
FGFR3_CHICK†	comp135596_c4_seq1	ACGTGACATTCGAAGATGCTGGTT	TCCAGAGACATGCTTACCTTCCTCT	ACGTGACATTCGAAGATGCTGGTT	GGAAACAAAGTAGCTTCCTCTGGTTC
KCC2A_DROME†	comp132233_c0_seq3	TTATAATAGCCGGAGAACCTGCTGCTT	TCCCTGCTGATCACCGTTTACTTC	GAGATCTGAAGCCGGAGAACCTGC	TCCCTGCTGATCACCGTTTACTTC
DC1I2_BOVIN†	comp130407_c0_seq6	CAATGTGCTCGCCAACATCACACA	ATGAAACAGAGGTGCCATCCGCTA	CAATGTGCTCGCCAACATCACACA	ATGAAACAGAGGTGCCATCCGCTA
UBR5_MOUSE†	comp133448_c1_seq1	TCCTTGCTTGGACACTTTCAATGCAG	AAGCCAACTTACCCACGATTTGTAG	TCCTTGCTTGGACACTTTCAATGCAG	CAGCTCGAGCAGTTGTTGAAGCCC
STK11_MOUSE†	comp134936_c1_seq1	ATTACCTTCAGCATCCAACATGACATC	GCTCATGCGAACGTGTGTCGTT	GGACCTCCTCAGCATCCAACATG	GCTCATGCGAACGTGTGTCGTT
XPO2_MOUSE†	comp130102_c0_seq1	TTCTCACCTTGGACATCTTGCTGTAA	CGAACTGCAAGTCGAGTCAATCCAG	GGACAAACTCTTGGACATCTTGCTGT	CGAACTGCAAGTCGAGTCAATCCAG
GPDA_DROPS†	comp130287_c0_seq1	GTGGAATCCGTCTGCTCTCAGATG	GGCCTGCCTACCTACCAATGGTT	GTGGAATCCGTCTGCTCTCAGATG	TCTTAGCACCAATGGTTGATTCACAAA
DPOD2_XENLA†	comp134092_c3_seq5	TCTGGAACTAACCGAACTCCATCAAT	TGATGTTGACATAATGCCAGGTGAAT	CCACTGGTCACTACAAATCGAACTCC	TGATGTTGACATAATGCCAGGTGAAT
ITF2_HUMAN†,§	comp133871_c0_seq14	CGACGAAAGTGCCACTATGAGTGA	ACTCGGACCCTTTCTCTTGCATT	CGACGAAAGTGCCACTATGAGTGA	ACTCGGACCCTTTCTCTTGCATT
KINH_LOLPE†	comp131267_c3_seq2	TGTATATCTGCAGGGCAAGCTGT	TTGAAGCGATGAGTCCTCCAGCCA	ATGGAGAACTGGGCAAGCTGT	TTGAAGCGATGAGTCCTCCAGCCA
NAPEP_BOVIN†	comp133855_c0_seq1	ACCCATCTCTCACCTGATTCACATC	GGATACAGTCCGTGACCATCCAGA	TCCACAGAGACTGATTCACATCCAAG	GGATACAGTCCGTGACCATCCAGA
DNLI1_XENLA†,§	comp134578_c1_seq1	GGGAACTGTCGTTTGAAGATGCAGA	GTTGATCAGGAGGAGGAGGAAGAAG	GGGAACTGTCGTTTGAAGATGCAGA	GTTGATCAGGAGGAGGAGGAAGAAG
SEN54_HUMAN†	comp135177_c2_seq2	ACATTACCTGAGGATGGCATTGGGTT	GACAAGCCGGTTGTTGCTTCTTT	CTTCGCCACTGAGGATGGCATT	GACAAGCCGGTTGTTGCTTCTTT
MK01_BOVIN†,§	comp75302_c0_seq1	TCTCAGTGACAGGCTCATCATCCGG	ACCCTAAAGCTTTGGATCTTCTGGATC	TCTCAGTGACAGGCTCATCATCCGG	ACCCTAAAGCTTTGGATCTTCTGGATC
FADS2_MOUSE†	comp127821_c0_seq3	CATGATGGTGAGGCACCTTTGATG	CCATTGTGCAAGCCCAGACTGG	CATGATGGTGAGGCACCTTTGATG	CCATTGTGCAAGCCCAGACTGG
TSC1_RAT‡	comp134940_c0_seq1	TCGGCTGCGGTAGATACTTTGTGA	TCCTGAAACCCTCTCCATGTGAGA	TCGGCTGCGGTAGATACTTTGTGA	TCCTGAAACCCTCTCCATGTGAGA
KCD15_XENLA‡	comp134855_c6_seq1	AGTATTTAGCCTCTTCCCACAGCTGC	ATACCCATCGTCTTGGACAGCCTA	AGTATTTAGCCTCTTCCCACAGCTGC	ATACCCATCGTCTTGGACAGCCTA
K0284_XENTR‡	comp135863_c0_seq1	AATCCTGGCGTACTATGAGCAGCCT	ATGCGAACTGATGGTGGAAGGTAT	AATCCTGGCGTACTATGAGCAGCCT	ATGCGAACTGATGGTGGAAGGTAT
GRP75_MOUSE‡,§	comp82500_c0_seq1	AAGAACCTTGTTGGAGTTCATTGGTAG	GACCAACTTCCAGCAGAGGAGTGC	AAGAACCTTGTTGGAGTTCATTGGTAG	GACCAACTTCCAGCAGAGGAGTGC
K1267_HUMAN‡,§	comp125670_c0_seq1	CTAACTGCAAGCCAAACAAATGGTAT	TGCGTGACGCTGAATGTAAAGTTC	CTAACTGCAAGCCAAACAAATGGTAT	TGCGTGACGCTGAATGTAAAGTTC
PCX1_HUMAN‡	comp135628_c1_seq1	TTGTCATGAATGTGCATAGATGGGAGA	ACGGACAAATATGTTCCCATTGCTGA	TTGTCATGAATGTGCATAGATGGGAGA	ACGGACAAATATGTTCCCATTGCTGA
CSPG4_HUMAN‡	comp135820_c2_seq4	TCCAGATCCTCAACACGATGCTTA	CGTCCGACATTTCGAAGAAGCAC	TCCAGATCCTCAACACGATGCTTA	CGTCCGACATTTCGAAGAAGCAC
AMRA1_MOUSE‡,§	comp134012_c1_seq1	GTGTGCGCAATACTCTTGATGGAAT	ACGTGCTTCATTGGACAAACGAGC	GTGTGCGCAATACTCTTGATGGAAT	ACGTGCTTCATTGGACAAACGAGC
ZN318_HUMAN‡	comp136395_c0_seq17	AACATTGGAGACAGAAACTGGTGATA	TCTCAATTGATGCTGGAATGGCGGT	AACATTGGAGACAGAAACTGGTGATA	TCTCAATTGATGCTGGAATGGCGGT
PTPRD_HUMAN‡	comp135883_c0_seq10	GAAGACGTAGTCAGTGTTCATGTCTAG	TGAGACTTCTGTTCGGCTCACTTG	GAAGACGTAGTCAGTGTTCATGTCTAG	TGAGACTTCTGTTCGGCTCACTTG
SYAC_BOMMO‡,§	comp135413_c0_seq1	GCATTCGTTGACCACGAGACAAA	TGATACAGTTGTGTCGTTGCTGCA	GCATTCGTTGACCACGAGACAAA	TGATACAGTTGTGTCGTTGCTGCA
ANR50_HUMAN‡	comp135873_c1_seq1	CACCTAATCAGAGTGGCGTTTC	ACCCTGCGGATCTTCAACTCCT	CACCTAATCAGAGTGGCGTTTC	ACCCTGCGGATCTTCAACTCCT
SYN2_RAT‡	comp133223_c0_seq3	CGGAAGGATAGGGACTTGACCCTG	TCGTGACAACTTCTCGACTGGAGT	CGGAAGGATAGGGACTTGACCCTG	TCGTGACAACTTCTCGACTGGAGT
RIR2_SPISO‡	comp114561_c0_seq1	TGCTGCTGTGGAAGGCATCTTC	TGTGTGAAGTCCTTCATCTCGAC	TGCTGCTGTGGAAGGCATCTTC	TGTGTGAAGTCCTTCATCTCGAC
RN168_HUMAN‡	comp110320_c0_seq1	ACTGTTTCTGAAGTGCCAAAGCAAA	TGGTCTCAAATCTTCTCCGTCTGTTT	ACTGTTTCTGAAGTGCCAAAGCAAA	TGGTCTCAAATCTTCTCCGTCTGTTT
NFH_HUMAN‡	comp123101_c0_seq2	TCCCACTTGGAGATTTCGTTGGAGA	AATCGCCGGAGATGAAGAACGGAA	TCCCACTTGGAGATTTCGTTGGAGA	AATCGCCGGAGATGAAGAACGGAA
NHR23_CAEEL‡	comp134557_c1_seq2	GACGGACAATTTGCAACTACCCAAA	TAACAGGTCATCGGTCACTGCACT	GACGGACAATTTGCAACTACCCAAA	TAACAGGTCATCGGTCACTGCACT
GRK5_BOVIN‡	comp85671_c0_seq1	TCTCGATTTGTGGTGAGTTTAGCTTA	GCAGCATAGAATATTGCCCTCTCTTC	TCTCGATTTGTGGTGAGTTTAGCTTA	GCAGCATAGAATATTGCCCTCTCTTC
NUD19_XENLA‡	comp128275_c0_seq1	GGATTTGCGCTATCAGGGAAACTTT	GCCATGCATCGACGAGTTACCGG	GGATTTGCGCTATCAGGGAAACTTT	GCCATGCATCGACGAGTTACCGG
HCN2_RAT‡	comp136065_c1_seq3	ACTGTCATCAGACTCTCGATCCTCA	GCACCATGGAAAGTGTAGCTGCTG	ACTGTCATCAGACTCTCGATCCTCA	GCACCATGGAAAGTGTAGCTGCTG
*RNA&DNA targets, that is, targets randomly chosen from a list of ~2100 regions for which the gDNA and the cDNA could have been differentially amplified (see Methods).
†RNA&DNA interesting targets (the same as RNA&DNA, but here targets which reside inside biologically interesting genes were chosen).
‡RNA-only targets, that is, targets randomly chosen in regions for which the gDNA and the cDNA could not have been differentially amplified. Therefore, the same set of primers was used for the cDNA and the gDNA.
§For these amplicons the gDNA targets were not amplified well enough for analysis.

## Sheet: TableF
Table F. Summary of the MiSeq validation experiments. Overall, 120 out of 143 A-to-G sites were validated, in 46/49 amplicons. None of the 12 non A-to-G sites in the amplified regions were validated.
	RNA&DNA*	RNA&DNA interesting†		RNA-only‡
Targeted Amplicons	20	20	20
Successful Amplicons	15	16	18
Amplicons with validated editing sites	13	16	17
A-to-G sites detected by HiSeq	43	47	53
Validated A-to-G sites by MiSeq	28	45	47
Non A-to-G sites detected by HiSeq	0	11	1
Validated non A-to-G sites by MiSeq	0	0	0
Additional A-to-G sites detected by MiSeq	47	51	72
Additional non A-to-G sites detected by MiSeq	19	18	9
*RNA&DNA refers to targets randomly chosen from a list of ~2100 regions for which the gDNA and the cDNA could have been differentially amplified (see Methods).
†RNA&DNA interesting is the same as RNA&DNA, but here targets which reside inside biologically interesting genes were chosen.
‡RNA-only refers to targets randomly chosen in regions for which the gDNA and the cDNA could not have been differentially amplified. Therefore, the same set of primers was used for the cDNA and the gDNA.

## Sheet: TableG
Table G. 143 A-to-G modification sites detected using the HiSeq data and were either validated (120 sites) or not validated (23 sites) using the MiSeq data. The locations of sites that were validated are in bold. Raw counts are presented in the format: 'Count of Gs' / 'Count of Gs and As'.
Swiss-Prot name	Trinity name	Location inside Trinity sequence	MiSeq cDNA	HiSeq cDNA	MiSeq gDNA	HiSeq gDNA
ANS1A_MOUSE*	comp131042_c2_seq10	930	33510/531347	2/72	65/396073	0/10
ANS1A_MOUSE*	comp131042_c2_seq10	939	41838/528544	6/62	37/392295	0/8
CPEB2_MOUSE*	comp129184_c2_seq1	1438	192265/344635	9/13	94/222975	0/11
DEPD5_HUMAN*	comp134663_c6_seq10	2429	1040/145594	1/235	71/489752	0/10
DEPD5_HUMAN*	comp134663_c6_seq10	2439	520/72286	5/220	48/245471	0/10
DUS23_MOUSE*	comp48319_c0_seq2	477	13456/506417	14/449	37/337233	0/9
HERC1_HUMAN*	comp135337_c4_seq1	4216	4106/270616	4/127	58/205740	0/12
HERC1_HUMAN*	comp135337_c4_seq1	4307	849/265396	2/115	0/204209	0/11
KCNAS_DROME*	comp122754_c0_seq2	1454	20794/58558	29/149	27/161830	0/24
KCNAS_DROME*	comp122754_c0_seq2	1455	1755/58820	3/139	44/162637	0/25
KCNAS_DROME*	comp122754_c0_seq2	1459	52079/59074	87/141	44/166716	0/19
KCNAS_DROME*	comp122754_c0_seq2	1460	18335/59119	10/151	53/166293	0/20
KCNAS_DROME*	comp122754_c0_seq2	1466	479/58924	132/143	39/164333	0/19
KCNAS_DROME*	comp122754_c0_seq2	1530	2020/57937	28/61	39/161624	0/17
NDUB5_MACFA*	comp129957_c2_seq1	679	27716/697743	22/1055	36/602045	0/15
SC23A_MOUSE*	comp131810_c0_seq1	1891	1752/449656	2/285	59/427765	0/2
SC23A_MOUSE*	comp131810_c0_seq1	1941	1420/404555	1/346	48/665610	0/10
SC6A9_XENLA*	comp129558_c0_seq1	2236	276861/706355	106/848	179/710313	0/15
SC6A9_XENLA*	comp129558_c0_seq1	2237	108852/705755	21/854	96/710518	0/15
TBCD_BOVIN*	comp132714_c0_seq1	1251	2637/197541	6/470	89/535106	0/10
TBCD_BOVIN*	comp132714_c0_seq1	1262	7651/194058	11/563	42/531883	0/13
TRABD_BOVIN*	comp119426_c0_seq1	2876	31834/572620	5/148	155/437969	0/22
WDFY3_HUMAN*	comp136330_c0_seq1	2453	21127/710353	1/60	31/580192	0/12
WDFY3_HUMAN*	comp136330_c0_seq1	2456	528187/710156	42/60	202/582711	0/12
WDFY3_HUMAN*	comp136330_c0_seq1	2464	39272/712189	2/64	63/581980	0/14
ZMIZ1_MOUSE*	comp135673_c2_seq4	2161	11741/233068	7/65	73/466851	0/23
ZMIZ1_MOUSE*	comp135673_c2_seq4	2226	9792/352182	2/62	77/644991	0/17
ZMIZ1_MOUSE*	comp135673_c2_seq4	2228	72433/350395	6/52	90/647339	0/15
AGO2_RABIT†	comp125420_c1_seq1	399	42278/177855	2/8	26/149356	0/7
AGO2_RABIT†	comp125420_c1_seq1	439	162785/173778	3/6	58/302591	0/11
DC1I2_BOVIN†	comp130407_c0_seq6	797	1690/448721	22/5304	46/394809	0/14
DC1I2_BOVIN†	comp130407_c0_seq6	829	1307/229798	21/5301	21/202132	0/11
DC1I2_BOVIN†	comp130407_c0_seq6	833	5223/228169	74/5313	34/200101	0/9
DPOD2_XENLA†	comp134092_c3_seq5	845	4654/235012	4/55	68/173524	0/12
DPOD2_XENLA†	comp134092_c3_seq5	924	3903/231942	11/50	31/168234	0/10
FGFR3_CHICK†	comp135596_c4_seq1	1401	14772/133830	6/40	80/590813	0/19
GPDA_DROPS†	comp130287_c0_seq1	890	1599/225732	30/2369	81/566084	0/6
GPDA_DROPS†	comp130287_c0_seq1	896	4223/227226	20/2288	79/566301	0/5
GPDA_DROPS†	comp130287_c0_seq1	899	12348/227445	93/2359	114/574482	0/4
GPDA_DROPS†	comp130287_c0_seq1	902	4085/226585	27/2411	80/570949	0/4
KCC2A_DROME†	comp132233_c0_seq3	554	73101/527605	61/426	55/388955	0/6
KCC2A_DROME†	comp132233_c0_seq3	559	8711/599334	7/420	77/385828	0/8
KCC2A_DROME†	comp132233_c0_seq3	563	14058/598289	3/410	53/386982	0/9
KCC2A_DROME†	comp132233_c0_seq3	564	595788/598416	410/412	298/385999	0/9
KCC2A_DROME†	comp132233_c0_seq3	579	4589/598729	2/378	55/388439	0/11
KCC2A_DROME†	comp132233_c0_seq3	583	7631/590923	5/374	88/379655	0/12
KCC2A_DROME†	comp133223_c0_seq3	1924	278356/280630	1931/1945	48/212666	0/16
KCC2A_DROME†	comp133223_c0_seq3	1925	259574/277408	1898/1924	59/211180	0/16
KINH_LOLPE†	comp131267_c3_seq2	1386	14063/208059	106/1975	22/144999	0/7
MLL1_HUMAN†	comp135801_c1_seq2	7549	64782/133341	14/26	32/180966	0/8
NAPEP_BOVIN†	comp133855_c0_seq1	1323	18229/252870	14/410	23/192610	0/12
NAPEP_BOVIN†	comp133855_c0_seq1	1326	163126/252977	182/406	66/193093	0/12
NR3BA_DANRE†	comp136183_c8_seq13	4330	1685/203926	3/84	7/43309	0/1
SEN54_HUMAN†	comp135177_c2_seq2	2140	19590/238179	18/37	25/197184	0/19
SEN54_HUMAN†	comp135177_c2_seq2	2141	6942/242285	8/39	31/201236	0/18
STK11_MOUSE†	comp134936_c1_seq1	480	18764/141954	33/315	29/172933	0/6
STK11_MOUSE†	comp134936_c1_seq1	482	4460/144216	10/337	20/172891	0/8
STK11_MOUSE†	comp134936_c1_seq1	485	8324/144771	26/334	37/260387	0/8
STK11_MOUSE†	comp134936_c1_seq1	488	2986/144933	7/339	194/261424	0/8
STK11_MOUSE†	comp134936_c1_seq1	552	126391/141215	222/252	23/265381	0/15
STK11_MOUSE†	comp134936_c1_seq1	553	60171/142885	91/251	28/266176	0/15
STK11_MOUSE†	comp134936_c1_seq1	570	57021/139830	95/238	37/258857	0/17
STK11_MOUSE†	comp134936_c1_seq1	571	140168/142341	240/254	35/260151	0/18
STK11_MOUSE†	comp134936_c1_seq1	572	16628/141737	29/243	41/262919	0/17
TAU_CAPHI†	comp132068_c0_seq30	1738	3168/247011	13/1713	25/165026	0/6
TAU_CAPHI†	comp132068_c0_seq30	1739	22330/246841	124/1719	20/165643	0/6
TAU_CAPHI†	comp132068_c0_seq30	1740	40150/245884	217/1704	61/165537	0/6
TAU_CAPHI†	comp132068_c0_seq30	1771	138002/239036	1247/1971	43/162039	0/8
TAU_CAPHI†	comp132068_c0_seq30	1806	9288/243713	49/1889	24/162855	0/9
TOP2B_CHICK†	comp134825_c7_seq1	2922	39477/192995	10/59	31/178682	0/3
UBR5_MOUSE†	comp133448_c1_seq1	2508	67/20186	1/61	24/465713	0/2
XPO2_MOUSE†	comp130102_c0_seq1	1017	4685/507057	5/337	42/327929	0/8
XPO2_MOUSE†	comp130102_c0_seq1	1045	39248/506439	48/357	18/324473	0/15
ANR50_HUMAN‡	comp135873_c1_seq1	154	2044/228735	6/791	157/234447	0/9
ANR50_HUMAN‡	comp135873_c1_seq1	155	2320/229001	7/826	45/235119	0/9
ANR50_HUMAN‡	comp135873_c1_seq1	220	1623/223533	6/1044	50/227576	0/12
ANR50_HUMAN‡	comp135873_c1_seq1	230	1403/222413	1/1017	23/226225	0/13
ANR50_HUMAN‡	comp135873_c1_seq1	237	2717/226422	9/1008	56/230487	0/14
CSPG4_HUMAN‡	comp135820_c2_seq4	1995	2551/148996	7/439	46/284287	0/23
FADS2_MOUSE‡	comp127821_c0_seq3	1185	727/102740	4/379	0/1084	0/7
FADS2_MOUSE‡	comp127821_c0_seq3	1221	24010/203888	30/374	96092	0/9
FADS2_MOUSE‡	comp127821_c0_seq3	1249	3941/101003	6/379	0/1058	0/8
GRK5_BOVIN‡	comp85671_c0_seq1	1004	8270/177267	3/90	17/202669	0/21
GRK5_BOVIN‡	comp85671_c0_seq1	1021	857/175433	1/89	23/202206	0/27
K0284_XENTR‡	comp135863_c0_seq1	1278	6473/263649	4/389	38/261692	0/22
K0284_XENTR‡	comp135863_c0_seq1	1290	47691/260167	58/383	51/257829	0/21
KCD15_XENLA‡	comp134855_c6_seq1	477	9256/15322	2/2	40/540810	0/40
MSH3_HUMAN‡	comp135239_c0_seq2	2096	2734/31649	2/14	7/19417	0/33
MSH3_HUMAN‡	comp135239_c0_seq2	2143	2469/31037	4/14	5/19046	0/25
NFH_HUMAN‡	comp123101_c0_seq2	290	3588/112677	12/100	6/86974	0/2
NFH_HUMAN‡	comp123101_c0_seq2	291	2643/113172	9/104	3/87177	0/2
NFH_HUMAN‡	comp123101_c0_seq2	350	12537/106999	22/337	28/119556	0/10
NFH_HUMAN‡	comp123101_c0_seq2	351	6425/108057	10/344	11/120261	0/10
NFH_HUMAN‡	comp123101_c0_seq2	388	1978/107835	6/420	20/119599	0/13
NHR23_CAEEL‡	comp134557_c1_seq2	2109	26294/323618	2/10	158/399764	0/26
NHR23_CAEEL‡	comp134557_c1_seq2	2139	66661/327362	1/13	80/403588	0/32
NUD19_XENLA‡	comp128275_c0_seq1	740	8321/138121	6/139	35/199901	0/51
NUD19_XENLA‡	comp128275_c0_seq1	743	19937/139120	9/142	35/197700	0/52
NUD19_XENLA‡	comp128275_c0_seq1	746	7517/140192	13/163	33/198254	0/50
NUD19_XENLA‡	comp128275_c0_seq1	749	1745/140609	5/160	33/199283	0/50
PCX1_HUMAN‡	comp135628_c1_seq1	251	365/63118	5/393	60/242149	0/14
PTPRD_HUMAN‡	comp135883_c0_seq10	3621	722/230515	3/2225	15/243971	0/21
RIR2_SPISO‡	comp114561_c0_seq1	1122	332/111398	18/1109	66/251289	0/17
RIR2_SPISO‡	comp114561_c0_seq1	1139	1559/219181	51/1146	125/492919	0/21
RIR2_SPISO‡	comp114561_c0_seq1	1165	1312/111176	15/1161	55/249939	0/23
RIR2_SPISO‡	comp114561_c0_seq1	1186	1254/106639	9/1306	39/238213	0/26
RN168_HUMAN‡	comp110320_c0_seq1	492	983/134952	4/61	38/230270	0/16
RN168_HUMAN‡	comp110320_c0_seq1	495	9808/136255	7/64	39/233495	0/16
SYN2_RAT‡	comp133223_c0_seq3	1878	11577/571122	29/2599	93/427248	0/25
SYN2_RAT‡	comp133223_c0_seq3	1887	7658/560335	24/2726	72/417828	0/24
SYN2_RAT‡	comp133223_c0_seq3	1888	5287/556761	21/2723	144/415538	0/22
TSC1_RAT‡	comp134940_c0_seq1	2232	2681/156255	5/490	24/179370	0/29
TSC1_RAT‡	comp134940_c0_seq1	2245	7059/156687	15/465	38/178236	0/23
TSC1_RAT‡	comp134940_c0_seq1	2246	77028/155222	218/476	42/177403	0/26
TSC1_RAT‡	comp134940_c0_seq1	2283	42614/151418	54/408	38/173331	0/14
TSC1_RAT‡	comp134940_c0_seq1	2286	18550/153842	21/424	48/175772	0/14
TSC1_RAT‡	comp134940_c0_seq1	2290	19565/155246	19/413	53/176581	0/14
ZN318_HUMAN‡	comp136395_c0_seq17	6027	61020/228884	12/20	76/279410	0/111
ZN318_HUMAN‡	comp136395_c0_seq17	6030	32334/229084	3/21	80/278916	0/114
ZN318_HUMAN‡	comp136395_c0_seq17	6101	24517/222619	3/23	67/269248	0/72
KCNAS_DROME*	comp122754_c0_seq2	1483	12/57451	9/132	33/160729	0/19
KCNAS_DROME*	comp122754_c0_seq2	1486	20/58586	119/135	36/163236	0/20
KCNAS_DROME*	comp122754_c0_seq2	1490	0/58225	12/133	0/162276	0/20
KCNAS_DROME*	comp122754_c0_seq2	1545	11/58338	12/59	27/164502	0/18
KCNAS_DROME*	comp122754_c0_seq2	1549	10/57725	38/54	34/160748	0/16
SPON1_CHICK*	comp126471_c0_seq1	2261	4090/68783	47/1104	4994/639779	0/24
SPON1_CHICK*	comp126471_c0_seq1	2281	26309/68451	390/938	64068/724465	0/21
SPON1_CHICK*	comp126471_c0_seq1	2282	1470/68804	30/953	5898/722954	0/21
SPON1_CHICK*	comp126471_c0_seq1	2288	18/1586	13/960	1270/495196	0/18
SPON1_CHICK*	comp126471_c0_seq1	2289	34/1586	14/945	2416/501004	0/18
SPON1_CHICK*	comp126471_c0_seq1	2294	119/1541	60/980	12897/497766	0/18
SPON1_CHICK*	comp126471_c0_seq1	2295	131/1549	67/976	13740/500240	0/18
SPON1_CHICK*	comp126471_c0_seq1	2296	1364/1544	902/947	151484/500857	0/16
SPON1_CHICK*	comp126471_c0_seq1	2297	162/1544	84/957	16214/720242	0/19
TRABD_BOVIN*	comp119426_c0_seq1	2846	78340/289052	34/158	140/474	0/11
NAPEP_BOVIN†	comp133855_c0_seq1	1310	37/126690	5/374	21/97834	0/13
UBR5_MOUSE†	comp133448_c1_seq1	2462	1/10181	3/88	38/465617	0/7
HCN2_RAT‡	comp136065_c1_seq3	2079	4/19751	1/16	75/395459	0/26
MSH3_HUMAN‡	comp135239_c0_seq2	2084	4/31780	5/15	4/19452	0/36
MSH3_HUMAN‡	comp135239_c0_seq2	2087	11/31697	10/15	1/19434	0/36
RN168_HUMAN‡	comp110320_c0_seq1	527	26/138399	3/64	46/239026	0/18
SYN2_RAT‡	comp133223_c0_seq3	1913	362/548872	19/2175	27/409782	0/19
TSC1_RAT‡	comp134940_c0_seq1	2263	17/126514	101/472	0/182417	0/21
*RNA&DNA targets, that is, targets randomly chosen from a list of ~2100 regions for which the gDNA and the cDNA could have been differentially amplified (see Methods).
†RNA&DNA interesting targets (the same as RNA&DNA, but here targets which reside inside biologically interesting genes were chosen).
‡RNA-only targets, that is, targets randomly chosen in regions for which the gDNA and the cDNA could not have been differentially amplified. Therefore, the same set of primers was used for the cDNA and the gDNA.

## Sheet: TableH
Table H. The Gene ontology (GO) terms enriched in a list of squid ORFs ranked by the cumulative recoding level, i.e. the editing level summed over all recoding sites28 (P-value < 1e-5). Neuronal and cytoskeleton terms are highly enriched. The three domains of GO: biological process, molecular function and cellular component, appear one after another. The false discovery rate (FDR) is the P-value …
GO term: Process	Description	P-value	FDR q-value	Enrichment
				(N, B, n, b)
GO:0007268	synaptic transmission	2.78e-15	9.14e-12	5.45 (7583,159,315,36)
GO:0007155	cell adhesion	1.63e-15	1.6e-11	2.62 (7583,266,913,84)
GO:0007154	cell communication	3.05e-14	7.52e-11	3.06 (7583,275,531,59)
GO:0016337	cell-cell adhesion	4.79e-14	9.43e-11	3.39 (7583,136,807,49)
GO:0006928	cellular component movement	6.34e-14	1.04e-10	2.03 (7583,483,922,119)
GO:0007156	homophilic cell adhesion	8.23e-14	1.16e-10	5.25 (7583,61,687,29)
GO:0023052	signaling	1.15e-13	1.26e-10	3.37 (7583,229,531,54)
GO:0007267	cell-cell signaling	1.64e-13	1.62e-10	4.40 (7583,219,315,40)
GO:0043087	regulation of GTPase activity	5.35e-12	4.79e-09	2.97 (7583,155,807,49)
GO:0042391	regulation of membrane potential	8.22e-11	6.23e-08	4.53 (7583,71,637,27)
GO:0065007	biological regulation	4.52e-10	3.18e-07	1.20 (7583,3941,881,551)
GO:0009118	regulation of nucleoside metabolic process	5.45e-10	3.58e-07	2.62 (7583,179,807,50)
GO:0051128	regulation of cellular component organization	1.36e-09	7.43e-07	1.72 (7583,651,881,130)
GO:0032502	developmental process	2.53e-09	1.31e-06	1.44 (7583,1733,713,234)
GO:1900542	regulation of purine nucleotide metabolic process	4.54e-09	2.24e-06	2.37 (7583,218,807,55)
GO:0065008	regulation of biological quality	5.53e-09	2.59e-06	1.76 (7583,1013,480,113)
GO:0034220	ion transmembrane transport	6.56e-09	2.94e-06	2.77 (7583,191,602,42)
GO:0006140	regulation of nucleotide metabolic process	7.18e-09	3.08e-06	2.35 (7583,220,807,55)
GO:0032318	regulation of Ras GTPase activity	7.8e-09	3.2e-06	2.95 (7583,93,996,36)
GO:0030001	metal ion transport	1.01e-08	3.97e-06	2.99 (7583,192,489,37)
GO:0006811	ion transport	1.09e-08	4.12e-06	1.89 (7583,419,864,90)
GO:0007165	signal transduction	1.3e-08	4.76e-06	1.54 (7583,1524,530,164)
GO:0032535	regulation of cellular component size	1.95e-08	6.61e-06	3.95 (7583,65,708,24)
GO:0051234	establishment of localization	1.94e-08	6.83e-06	1.36 (7583,1559,999,280)
GO:0050794	regulation of cellular process	2.54e-08	7.59e-06	1.23 (7583,3550,711,410)
GO:0007166	cell surface receptor signaling pathway	2.51e-08	7.74e-06	1.78 (7583,829,530,103)
GO:0050789	regulation of biological process	2.44e-08	7.75e-06	1.22 (7583,3731,711,427)
GO:0006813	potassium ion transport	2.4e-08	7.87e-06	6.44 (7583,37,477,15)
GO:0090066	regulation of anatomical structure size	3.69e-08	1.07e-05	4.04 (7583,94,479,24)
GO:0032879	regulation of localization	4.35e-08	1.22e-05	1.87 (7583,648,543,87)
GO:0044765	single-organism transport	4.62e-08	1.26e-05	1.42 (7583,1192,999,223)
GO:0006810	transport	5.5e-08	1.46e-05	1.36 (7583,1533,999,274)
GO:0051493	regulation of cytoskeleton organization	9.59e-08	2.49e-05	2.68 (7583,143,773,39)
GO:0031329	regulation of cellular catabolic process	1.09e-07	2.74e-05	2.03 (7583,306,807,66)
GO:0007010	cytoskeleton organization	1.17e-07	2.88e-05	2.08 (7583,282,803,62)
GO:0044767	single-organism developmental process	1.42e-07	3.41e-05	1.41 (7583,1570,725,212)
GO:0006812	cation transport	1.75e-07	4.11e-05	2.52 (7583,258,489,42)
GO:0050808	synapse organization	2.06e-07	4.62e-05	4.09 (7583,52,713,20)
GO:0016192	vesicle-mediated transport	2.04e-07	4.68e-05	1.78 (7583,396,958,89)
GO:0019220	regulation of phosphate metabolic process	2.36e-07	5.17e-05	1.61 (7583,645,915,125)
GO:0031346	positive regulation of cell projection organization	2.47e-07	5.17e-05	5.21 (7583,83,298,17)
GO:0032970	regulation of actin filament-based process	2.46e-07	5.27e-05	3.09 (7583,96,741,29)
GO:0051174	regulation of phosphorus metabolic process	2.69e-07	5.52e-05	1.60 (7583,653,915,126)
GO:0032956	regulation of actin cytoskeleton organization	2.81e-07	5.64e-05	3.15 (7583,91,741,28)
GO:0051716	cellular response to stimulus	2.94e-07	5.8e-05	1.38 (7583,2005,591,216)
GO:0040011	locomotion	3.14e-07	5.94e-05	1.97 (7583,277,902,65)
GO:0003008	system process	3.1e-07	6e-05	1.93 (7583,391,713,71)
GO:0031344	regulation of cell projection organization	3.86e-07	7.17e-05	4.00 (7583,140,298,22)
GO:0097485	neuron projection guidance	5.79e-07	0.000106	2.64 (7583,141,734,36)
GO:0044087	regulation of cellular component biogenesis	6.61e-07	0.000116	2.36 (7583,189,715,42)
GO:0007186	G-protein coupled receptor signaling pathway	8.7e-07	0.00015	2.56 (7583,187,570,36)
GO:0051049	regulation of transport	1.28e-06	0.000218	1.97 (7583,460,528,63)
GO:0001508	action potential	1.36e-06	0.000228	7.00 (7583,17,637,10)
GO:0051130	positive regulation of cellular component organization	1.67e-06	0.000274	2.07 (7583,265,734,53)
GO:0048856	anatomical structure development	2.19e-06	0.000353	1.42 (7583,1054,906,179)
GO:0051656	establishment of organelle localization	2.28e-06	0.000363	2.81 (7583,82,922,28)
GO:0048870	cell motility	2.55e-06	0.000398	1.91 (7583,251,966,61)
GO:0071805	potassium ion transmembrane transport	2.85e-06	0.000439	6.61 (7583,18,637,10)
GO:0023051	regulation of signaling	3.85e-06	0.000566	1.51 (7583,925,715,132)
GO:0009894	regulation of catabolic process	3.82e-06	0.00057	1.93 (7583,350,673,60)
GO:0050896	response to stimulus	5.07e-06	0.000735	1.23 (7583,2489,881,357)
GO:0050767	regulation of neurogenesis	6.51e-06	0.000929	2.18 (7583,179,795,41)
GO:0044707	single-multicellular organism process	6.67e-06	0.000939	1.38 (7583,1093,971,193)
GO:0070838	divalent metal ion transport	6.82e-06	0.000946	3.35 (7583,79,602,21)
GO term: Function	Description	P-value	FDR q-value	Enrichment
				(N, B, n, b)
GO:0022836	gated channel activity	3.58e-24	1.16e-20	5.77 (7583,99,637,48)
GO:0005261	cation channel activity	2.09e-17	1.12e-14	5.07 (7583,94,637,40)
GO:0022843	voltage-gated cation channel activity	4.06e-15	1.87e-12	8.19 (7583,43,495,23)
GO:0008092	cytoskeletal protein binding	1.04e-13	4.19e-11	2.36 (7583,330,828,85)
GO:0022832	voltage-gated channel activity	1.17e-13	4.22e-11	5.64 (7583,57,637,27)
GO:0046873	metal ion transmembrane transporter activity	2.19e-12	6.43e-10	3.93 (7583,148,495,38)
GO:0005085	guanyl-nucleotide exchange factor activity	1.37e-11	3.69e-09	4.45 (7583,87,588,30)
GO:0022834	ligand-gated channel activity	7.04e-11	1.75e-08	5.54 (7583,50,602,22)
GO:0015075	ion transmembrane transporter activity	2.19e-10	4.71e-08	2.66 (7583,307,502,54)
GO:0005516	calmodulin binding	2.41e-10	4.86e-08	4.40 (7583,79,589,27)
GO:0022890	inorganic cation transmembrane transporter activity	4.53e-10	8.61e-08	3.19 (7583,187,495,39)
GO:0005230	extracellular ligand-gated ion channel activity	7.49e-10	1.34e-07	11.56 (7583,25,315,12)
GO:0005215	transporter activity	1.14e-09	1.93e-07	1.80 (7583,489,974,113)
GO:0015079	potassium ion transmembrane transporter activity	1.55e-09	2.5e-07	6.13 (7583,45,495,18)
GO:0008324	cation transmembrane transporter activity	1.81e-09	2.79e-07	2.83 (7583,238,495,44)
GO:0005231	excitatory extracellular ligand-gated ion channel activity	2.73e-09	4.01e-07	14.15 (7583,19,282,10)
GO:0022857	transmembrane transporter activity	4.13e-09	5.81e-07	2.39 (7583,360,502,57)
GO:0005509	calcium ion binding	5.13e-09	6.63e-07	2.05 (7583,271,994,73)
GO:0005249	voltage-gated potassium channel activity	8.73e-09	1.08e-06	7.97 (7583,25,495,13)
GO:0022892	substrate-specific transporter activity	9.29e-09	1.11e-06	2.16 (7583,391,602,67)
GO:0005267	potassium channel activity	9.43e-09	1.09e-06	6.76 (7583,34,495,15)
GO:0005515	protein binding	2.55e-08	2.84e-06	1.18 (7583,3824,938,560)
GO:0004888	transmembrane signaling receptor activity	3.48e-08	3.75e-06	2.57 (7583,215,605,44)
GO:0003779	actin binding	5.77e-08	6.01e-06	2.49 (7583,158,828,43)
GO:0004872	receptor activity	1.14e-07	1.15e-05	2.18 (7583,327,605,57)
GO:0015085	calcium ion transmembrane transporter activity	3.68e-07	3.6e-05	4.45 (7583,51,602,18)
GO:0004889	acetylcholine-activated cation-selective channel activity	4.2e-07	3.99e-05	28.85 (7583,6,219,5)
GO:0017124	SH3 domain binding	5.74e-07	5.3e-05	3.34 (7583,54,966,23)
GO:0030695	GTPase regulator activity	6.66e-07	5.82e-05	2.33 (7583,140,999,43)
GO:0005086	ARF guanyl-nucleotide exchange factor activity	7.02e-07	5.97e-05	12.19 (7583,9,484,7)
GO:0038023	signaling receptor activity	8.81e-07	7.3e-05	2.28 (7583,247,605,45)
GO:0005245	voltage-gated calcium channel activity	1.85e-06	0.000149	9.54 (7583,13,489,8)
GO:0072509	divalent inorganic cation transmembrane transporter activity	2.64e-06	0.000208	3.80 (7583,63,602,19)
GO:0060589	nucleoside-triphosphatase regulator activity	3.21e-06	0.000247	2.22 (7583,147,999,43)
GO:0005262	calcium channel activity	3.78e-06	0.000284	4.50 (7583,42,602,15)
GO:0004871	signal transducer activity	7.17e-06	0.000526	1.86 (7583,385,666,63)
GO:0015077	monovalent inorganic cation transmembrane transporter activity	9.1e-06	0.000639	2.99 (7583,128,495,25)
GO:0051015	actin filament binding	9.38e-06	0.000645	6.90 (7583,35,314,10)
GO:0015464	acetylcholine receptor activity	1.16e-05	0.000781	11.06 (7583,8,514,6)
GO term: Component	Description	P-value	FDR q-value	Enrichment
				(N, B, n, b)
GO:0030054	cell junction	2.42e-25	2.98e-22	2.86 (7583,328,922,114)
GO:0005886	plasma membrane	5.1e-25	3.14e-22	1.86 (7583,1132,949,263)
GO:0044456	synapse part	9.74e-18	4e-15	3.21 (7583,177,907,68)
GO:0044459	plasma membrane part	2.03e-17	6.26e-15	1.98 (7583,704,907,167)
GO:0097458	neuron part	2.47e-15	6.09e-13	2.32 (7583,384,904,106)
GO:0034702	ion channel complex	8.75e-15	1.8e-12	5.37 (7583,71,637,32)
GO:0097060	synaptic membrane	2.54e-14	4.47e-12	3.75 (7583,98,907,44)
GO:1902495	transmembrane transporter complex	3.35e-14	5.15e-12	5.57 (7583,84,502,31)
GO:0042995	cell projection	2.59e-13	3.2e-11	1.99 (7583,500,907,119)
GO:0016020	membrane	6.39e-13	7.16e-11	1.46 (7583,2374,676,308)
GO:0045211	postsynaptic membrane	1.05e-12	1.08e-10	3.77 (7583,82,907,37)
GO:0043005	neuron projection	1.24e-12	1.17e-10	2.43 (7583,252,904,73)
GO:0005887	integral component of plasma membrane	8.21e-10	7.23e-08	2.29 (7583,349,626,66)
GO:0033267	axon part	1.28e-09	1.05e-07	3.88 (7583,51,997,26)
GO:0044430	cytoskeletal part	1.63e-09	1.26e-07	1.72 (7583,631,894,128)
GO:0044425	membrane part	6.42e-09	4.65e-07	1.31 (7583,2189,907,344)
GO:0034703	cation channel complex	1.62e-08	1.11e-06	5.47 (7583,37,637,17)
GO:0045202	synapse	1.7e-08	1.1e-06	2.96 (7583,98,915,35)
GO:0030027	lamellipodium	3.2e-08	1.97e-06	3.35 (7583,71,894,28)
GO:0044463	cell projection part	5.63e-08	3.3e-06	2.03 (7583,298,853,68)
GO:0005912	adherens junction	1.67e-07	9.37e-06	2.75 (7583,94,996,34)
GO:0005911	cell-cell junction	1.76e-07	9.43e-06	2.67 (7583,103,993,36)
GO:0043235	receptor complex	3.27e-07	1.68e-05	3.58 (7583,87,585,24)
GO:0005892	acetylcholine-gated channel complex	4.2e-07	2.07e-05	28.85 (7583,6,219,5)
GO:0070161	anchoring junction	4.32e-07	2.05e-05	2.67 (7583,97,996,34)
GO:0016323	basolateral plasma membrane	1.8e-06	8.19e-05	3.46 (7583,57,807,21)
GO:0030425	dendrite	2.56e-06	0.000113	2.52 (7583,113,904,34)
GO:0014704	intercalated disc	1.15e-05	0.00049	34.67 (7583,7,125,4)
GO:0030659	cytoplasmic vesicle membrane	2.16e-05	0.000888	2.02 (7583,172,937,43)
GO:0044291	cell-cell contact zone	2.39e-05	0.000949	30.33 (7583,8,125,4)
GO:0005891	voltage-gated calcium channel complex	2.58e-05	0.000993	10.34 (7583,9,489,6)

## Sheet: TableI
Table I. Squid ORFs mapped to all human KEGG pathways20. For each pathway the number of participating human genes is indicated as well as the number of identifiable genes in the squid transcriptome. The identifiable genes can be: (a) 'heavily edited', defined as proteins for which the cumulative recoding level, i.e. the editing level summed over all recoding sites, exceeds unity, (b) 'edited', if…
Pathway	Title	Number of genes	Identifiable genes	Heavily edited	Edited	Not
						edited
hsa04940	Type I diabetes mellitus	47	4	3	4	0
hsa00780	Biotin metabolism	3	2	1	2	0
hsa00603	Glycosphingolipid biosynthesis - globo series	14	6	2	6	0
hsa00604	Glycosphingolipid biosynthesis - ganglio series	15	4	1	4	0
hsa00072	Synthesis and degradation of ketone bodies	9	5	1	5	0
hsa00650	Butanoate metabolism	26	15	2	15	0
hsa00785	Lipoic acid metabolism	3	3	0	3	0
hsa00300	Lysine biosynthesis	2	2	0	2	0
hsa00750	Vitamin B6 metabolism	6	4	0	4	0
hsa00524	Butirosin and neomycin biosynthesis	5	3	0	3	0
hsa00471	D-Glutamine and D-glutamate metabolism	4	1	0	1	0
hsa00020	Citrate cycle (TCA cycle)	30	25	4	24	1
hsa04930	Type II diabetes mellitus	48	22	13	21	1
hsa05213	Endometrial cancer	52	18	8	17	1
hsa04140	Regulation of autophagy	39	18	7	17	1
hsa05033	Nicotine addiction	40	17	12	16	1
hsa00052	Galactose metabolism	31	17	4	16	1
hsa04612	Antigen processing and presentation	82	16	2	15	1
hsa04710	Circadian rhythm	30	15	4	14	1
hsa01210	2-Oxocarboxylic acid metabolism	17	15	3	14	1
hsa04744	Phototransduction	29	13	6	12	1
hsa05220	Chronic myeloid leukemia	73	26	7	24	2
hsa00450	Selenocompound metabolism	17	13	1	12	1
hsa04973	Carbohydrate digestion and absorption	45	12	6	11	1
hsa04910	Insulin signaling pathway	141	72	29	65	7
hsa04070	Phosphatidylinositol signaling system	81	41	22	37	4
hsa05217	Basal cell carcinoma	55	20	10	18	2
hsa00512	Mucin type O-Glycan biosynthesis	31	9	6	8	1
hsa05210	Colorectal cancer	62	26	8	23	3
hsa00010	Glycolysis / Gluconeogenesis	66	26	2	23	3
hsa05223	Non-small cell lung cancer	56	17	6	15	2
hsa04530	Tight junction	134	48	20	42	6
hsa00900	Terpenoid backbone biosynthesis	21	16	2	14	2
hsa00130	Ubiquinone and other terpenoid-quinone biosynthesis	10	8	0	7	1
hsa04919	Thyroid hormone signaling pathway	119	55	21	48	7
hsa05214	Glioma	65	23	11	20	3
hsa05020	Prion diseases	36	15	2	13	2
hsa05218	Melanoma	71	14	5	12	2
hsa04666	Fc gamma R-mediated phagocytosis	91	35	12	30	5
hsa04340	Hedgehog signaling pathway	51	21	6	18	3
hsa00051	Fructose and mannose metabolism	32	21	3	18	3
hsa00500	Starch and sucrose metabolism	56	28	3	24	4
hsa00520	Amino sugar and nucleotide sugar metabolism	47	34	5	29	5
hsa04520	Adherens junction	73	40	14	34	6
hsa04630	Jak-STAT signaling pathway	156	20	5	17	3
hsa04360	Axon guidance	127	39	19	33	6
hsa05216	Thyroid cancer	29	13	6	11	2
hsa04960	Aldosterone-regulated sodium reabsorption	39	13	6	11	2
hsa04914	Progesterone-mediated oocyte maturation	86	39	9	33	6
hsa00511	Other glycan degradation	18	13	1	11	2
hsa04150	mTOR signaling pathway	60	32	12	27	5
hsa03060	Protein export	23	19	3	16	3
hsa04920	Adipocytokine signaling pathway	70	25	7	21	4
hsa04917	Prolactin signaling pathway	72	25	6	21	4
hsa05100	Bacterial invasion of epithelial cells	76	36	16	30	6
hsa05030	Cocaine addiction	50	30	11	25	5
hsa04614	Renin-angiotensin system	17	6	2	5	1
hsa05221	Acute myeloid leukemia	57	24	7	20	4
hsa00430	Taurine and hypotaurine metabolism	10	6	1	5	1
hsa00640	Propanoate metabolism	32	18	3	15	3
hsa05321	Inflammatory bowel disease (IBD)	69	6	1	5	1
hsa05215	Prostate cancer	89	29	9	24	5
hsa04662	B cell receptor signaling pathway	72	23	5	19	4
hsa01200	Carbon metabolism	106	74	8	61	13
hsa04510	Focal adhesion	207	78	24	64	14
hsa00601	Glycosphingolipid biosynthesis - lacto and neolacto series	26	11	5	9	2
hsa00562	Inositol phosphate metabolism	61	33	13	27	6
hsa00380	Tryptophan metabolism	40	22	5	18	4
hsa04114	Oocyte meiosis	110	55	12	45	10
hsa00770	Pantothenate and CoA biosynthesis	17	11	2	9	2
hsa03450	Non-homologous end-joining	13	11	2	9	2
hsa04390	Hippo signaling pathway	154	60	19	49	11
hsa04721	Synaptic vesicle cycle	63	27	14	22	5
hsa04012	ErbB signaling pathway	88	32	13	26	6
hsa05132	Salmonella infection	86	32	12	26	6
hsa00310	Lysine degradation	51	32	11	26	6
hsa04120	Ubiquitin mediated proteolysis	137	95	25	77	18
hsa02010	ABC transporters	44	21	11	17	4
hsa00250	Alanine, aspartate and glutamate metabolism	32	21	2	17	4
hsa03430	Mismatch repair	23	21	2	17	4
hsa04144	Endocytosis	203	93	32	75	18
hsa04728	Dopaminergic synapse	131	62	20	50	12
hsa05205	Proteoglycans in cancer	225	87	31	70	17
hsa00533	Glycosaminoglycan biosynthesis - keratan sulfate	15	5	3	4	1
hsa05143	African trypanosomiasis	34	5	2	4	1
hsa00760	Nicotinate and nicotinamide metabolism	28	15	5	12	3
hsa03320	PPAR signaling pathway	69	30	4	24	6
hsa00360	Phenylalanine metabolism	18	10	1	8	2
hsa05162	Measles	134	34	8	27	7
hsa05110	Vibrio cholerae infection	54	29	7	23	6
hsa00620	Pyruvate metabolism	42	24	5	19	5
hsa04750	Inflammatory mediator regulation of TRP channels	99	43	17	34	9
hsa04722	Neurotrophin signaling pathway	120	57	17	45	12
hsa04068	FoxO signaling pathway	133	52	15	41	11
hsa05211	Renal cell carcinoma	66	33	9	26	7
hsa04915	Estrogen signaling pathway	100	47	16	37	10
hsa00071	Fatty acid degradation	44	28	3	22	6
hsa04146	Peroxisome	81	56	3	44	12
hsa00040	Pentose and glucuronate interconversions	34	23	2	18	5
hsa00280	Valine, leucine and isoleucine degradation	44	32	3	25	7
hsa05031	Amphetamine addiction	68	41	14	32	9
hsa05145	Toxoplasmosis	122	41	5	32	9
hsa04964	Proximal tubule bicarbonate reclamation	23	9	2	7	2
hsa04966	Collecting duct acid secretion	27	9	2	7	2
hsa04660	T cell receptor signaling pathway	104	36	8	28	8
hsa00350	Tyrosine metabolism	39	18	2	14	4
hsa00480	Glutathione metabolism	51	27	3	21	6
hsa00410	beta-Alanine metabolism	30	18	2	14	4
hsa04310	Wnt signaling pathway	139	58	17	45	13
hsa00564	Glycerophospholipid metabolism	92	49	13	38	11
hsa05200	Pathways in cancer	327	129	39	100	29
hsa04974	Protein digestion and absorption	89	31	11	24	7
hsa05134	Legionellosis	55	22	1	17	5
hsa04810	Regulation of actin cytoskeleton	215	79	32	61	18
hsa04713	Circadian entrainment	97	48	17	37	11
hsa04062	Chemokine signaling pathway	189	48	11	37	11
hsa05412	Arrhythmogenic right ventricular cardiomyopathy (ARVC)	74	26	15	20	6
hsa04261	Adrenergic signaling in cardiomyocytes	149	65	24	50	15
hsa04512	ECM-receptor interaction	87	26	5	20	6
hsa01230	Biosynthesis of amino acids	74	52	7	40	12
hsa00830	Retinol metabolism	64	26	0	20	6
hsa05206	MicroRNAs in cancer	294	69	17	53	16
hsa05130	Pathogenic Escherichia coli infection	55	30	11	23	7
hsa05131	Shigellosis	61	30	6	23	7
hsa00860	Porphyrin and chlorophyll metabolism	43	30	2	23	7
hsa04921	Oxytocin signaling pathway	159	68	25	52	16
hsa04975	Fat digestion and absorption	41	17	3	13	4
hsa04014	Ras signaling pathway	227	80	22	61	19
hsa05212	Pancreatic cancer	66	21	4	16	5
hsa04962	Vasopressin-regulated water reabsorption	45	25	5	19	6
hsa05032	Morphine addiction	93	37	13	28	9
hsa04724	Glutamatergic synapse	116	45	17	34	11
hsa00061	Fatty acid biosynthesis	6	4	2	3	1
hsa04742	Taste transduction	53	8	3	6	2
hsa04270	Vascular smooth muscle contraction	121	56	21	42	14
hsa05219	Bladder cancer	38	12	4	9	3
hsa04723	Retrograde endocannabinoid signaling	103	44	14	33	11
hsa05164	Influenza A	179	52	11	39	13
hsa05168	Herpes simplex infection	188	68	8	51	17
hsa05204	Chemical carcinogenesis	80	28	2	21	7
hsa00590	Arachidonic acid metabolism	64	20	1	15	5
hsa00982	Drug metabolism - cytochrome P450	68	24	1	18	6
hsa00400	Phenylalanine, tyrosine and tryptophan biosynthesis	5	4	0	3	1
hsa00120	Primary bile acid biosynthesis	17	8	0	6	2
hsa00790	Folate biosynthesis	14	8	0	6	2
hsa04080	Neuroactive ligand-receptor interaction	275	99	43	74	25
hsa04725	Cholinergic synapse	113	51	20	38	13
hsa00330	Arginine and proline metabolism	59	39	4	29	10
hsa05160	Hepatitis C	133	35	7	26	9
hsa04330	Notch signaling pathway	48	27	8	20	7
hsa00980	Metabolism of xenobiotics by cytochrome P450	74	23	1	17	6
hsa04151	PI3K-Akt signaling pathway	347	107	23	79	28
hsa04916	Melanogenesis	101	42	13	31	11
hsa04540	Gap junction	89	42	12	31	11
hsa04621	NOD-like receptor signaling pathway	57	19	1	14	5
hsa04670	Leukocyte transendothelial migration	118	34	13	25	9
hsa04970	Salivary secretion	90	34	13	25	9
hsa03050	Proteasome	44	34	5	25	9
hsa04141	Protein processing in endoplasmic reticulum	168	109	16	80	29
hsa04350	TGF-beta signaling pathway	80	30	3	22	8
hsa04664	Fc epsilon RI signaling pathway	70	26	7	19	7
hsa04911	Insulin secretion	86	37	17	27	10
hsa05410	Hypertrophic cardiomyopathy (HCM)	83	33	15	24	9
hsa04650	Natural killer cell mediated cytotoxicity	135	22	6	16	6
hsa05014	Amyotrophic lateral sclerosis (ALS)	51	22	4	16	6
hsa01212	Fatty acid metabolism	48	33	5	24	9
hsa05166	HTLV-I infection	263	95	24	69	26
hsa04142	Lysosome	122	73	18	53	20
hsa04020	Calcium signaling pathway	180	80	29	58	22
hsa04740	Olfactory transduction	405	18	7	13	5
hsa00053	Ascorbate and aldarate metabolism	27	18	0	13	5
hsa04010	MAPK signaling pathway	257	100	29	72	28
hsa05133	Pertussis	75	25	5	18	7
hsa04950	Maturity onset diabetes of the young	25	7	3	5	2
hsa04727	GABAergic synapse	90	35	11	25	10
hsa04720	Long-term potentiation	67	35	10	25	10
hsa05120	Epithelial cell signaling in Helicobacter pylori infection	68	28	8	20	8
hsa04611	Platelet activation	131	49	12	35	14
hsa04066	HIF-1 signaling pathway	106	49	9	35	14
hsa00100	Steroid biosynthesis	20	7	1	5	2
hsa00591	Linoleic acid metabolism	29	7	1	5	2
hsa00592	alpha-Linolenic acid metabolism	25	7	1	5	2
hsa00531	Glycosaminoglycan degradation	19	14	1	10	4
hsa00740	Riboflavin metabolism	12	7	0	5	2
hsa03013	RNA transport	164	125	23	89	36
hsa00561	Glycerolipid metabolism	55	31	5	22	9
hsa04110	Cell cycle	124	65	11	46	19
hsa05142	Chagas disease (American trypanosomiasis)	104	34	6	24	10
hsa04730	Long-term depression	60	27	9	19	8
hsa00983	Drug metabolism - other enzymes	46	27	2	19	8
hsa05146	Amoebiasis	109	40	9	28	12
hsa04122	Sulfur relay system	10	10	0	7	3
hsa04972	Pancreatic secretion	96	33	11	23	10
hsa04210	Apoptosis	86	33	6	23	10
hsa04620	Toll-like receptor signaling pathway	106	33	4	23	10
hsa04726	Serotonergic synapse	114	49	16	34	15
hsa04320	Dorso-ventral axis formation	24	13	2	9	4
hsa05161	Hepatitis B	146	48	8	33	15
hsa05222	Small cell lung cancer	86	32	5	22	10
hsa04932	Non-alcoholic fatty liver disease (NAFLD)	151	80	10	55	25
hsa04064	NF-kappa B signaling pathway	91	35	5	24	11
hsa04961	Endocrine and other factor-regulated calcium reabsorption	48	19	7	13	6
hsa04380	Osteoclast differentiation	132	38	7	26	12
hsa00030	Pentose phosphate pathway	28	19	1	13	6
hsa04514	Cell adhesion molecules (CAMs)	147	22	9	15	7
hsa05152	Tuberculosis	179	56	9	38	18
hsa03015	mRNA surveillance pathway	91	59	14	40	19
hsa04971	Gastric acid secretion	75	31	10	21	10
hsa05169	Epstein-Barr virus infection	202	100	16	67	33
hsa05414	Dilated cardiomyopathy	90	36	14	24	12
hsa05416	Viral myocarditis	62	18	7	12	6
hsa04145	Phagosome	155	57	13	38	19
hsa04115	p53 signaling pathway	68	27	6	18	9
hsa00340	Histidine metabolism	28	15	3	10	5
hsa03008	Ribosome biogenesis in eukaryotes	84	63	7	42	21
hsa05144	Malaria	49	9	1	6	3
hsa03440	Homologous recombination	28	21	1	14	7
hsa00600	Sphingolipid metabolism	47	24	1	16	8
hsa00140	Steroid hormone biosynthesis	57	24	0	16	8
hsa01220	Degradation of aromatic compounds	3	3	0	2	1
hsa00532	Glycosaminoglycan biosynthesis - chondroitin sulfate / dermatan sulfate	20	9	0	6	3
hsa03460	Fanconi anemia pathway	53	35	7	23	12
hsa05010	Alzheimer's disease	168	99	15	65	34
hsa04015	Rap1 signaling pathway	213	81	26	53	28
hsa00270	Cysteine and methionine metabolism	37	26	2	17	9
hsa04978	Mineral absorption	51	17	6	11	6
hsa00565	Ether lipid metabolism	42	17	3	11	6
hsa04912	GnRH signaling pathway	92	42	14	27	15
hsa04977	Vitamin digestion and absorption	24	11	3	7	4
hsa04370	VEGF signaling pathway	61	22	3	14	8
hsa00630	Glyoxylate and dicarboxylate metabolism	25	22	3	14	8
hsa04260	Cardiac muscle contraction	78	35	10	22	13
hsa05323	Rheumatoid arthritis	93	16	3	10	6
hsa00534	Glycosaminoglycan biosynthesis - heparan sulfate / heparin	24	16	2	10	6
hsa05012	Parkinson's disease	143	88	6	55	33
hsa04668	TNF signaling pathway	110	45	7	28	17
hsa03022	Basal transcription factors	45	37	5	23	14
hsa00563	Glycosylphosphatidylinositol(GPI)-anchor biosynthesis	25	21	0	13	8
hsa04622	RIG-I-like receptor signaling pathway	70	26	2	16	10
hsa00190	Oxidative phosphorylation	133	80	3	49	31
hsa04060	Cytokine-cytokine receptor interaction	265	18	1	11	7
hsa04918	Thyroid hormone synthesis	72	33	6	20	13
hsa04976	Bile secretion	72	33	5	20	13
hsa03040	Spliceosome	131	104	6	63	41
hsa00910	Nitrogen metabolism	17	5	0	3	2
hsa05016	Huntington's disease	183	113	13	67	46
hsa05203	Viral carcinogenesis	206	103	20	60	43
hsa00230	Purine metabolism	171	113	14	65	48
hsa00062	Fatty acid elongation	23	14	0	8	6
hsa03030	DNA replication	36	30	0	17	13
hsa04913	Ovarian steroidogenesis	51	16	2	9	7
hsa00260	Glycine, serine and threonine metabolism	39	25	2	14	11
hsa05140	Leishmaniasis	76	18	2	10	8
hsa05202	Transcriptional misregulation in cancer	179	73	14	40	33
hsa03018	RNA degradation	73	57	6	31	26
hsa00510	N-Glycan biosynthesis	49	35	4	19	16
hsa03420	Nucleotide excision repair	47	39	4	21	18
hsa00290	Valine, leucine and isoleucine biosynthesis	4	2	1	1	1
hsa00514	Other types of O-glycan biosynthesis	31	18	3	9	9
hsa00920	Sulfur metabolism	10	8	1	4	4
hsa04640	Hematopoietic cell lineage	88	8	1	4	4
hsa04623	Cytosolic DNA-sensing pathway	64	24	2	12	12
hsa00730	Thiamine metabolism	4	4	0	2	2
hsa04672	Intestinal immune network for IgA production	51	2	0	1	1
hsa04130	SNARE interactions in vesicular transport	34	22	0	11	11
hsa01040	Biosynthesis of unsaturated fatty acids	21	12	0	6	6
hsa03010	Ribosome	135	109	0	54	55
hsa00240	Pyrimidine metabolism	105	83	7	41	42
hsa03410	Base excision repair	33	26	2	12	14
hsa05034	Alcoholism	180	90	14	41	49
hsa05340	Primary immunodeficiency	36	7	1	3	4
hsa00670	One carbon pool by folate	20	12	0	5	7
hsa03020	RNA polymerase	32	27	1	9	18
hsa05320	Autoimmune thyroid disease	56	3	0	1	2
hsa00460	Cyanoamino acid metabolism	7	3	0	1	2
hsa05322	Systemic lupus erythematosus	138	44	1	5	39
hsa05150	Staphylococcus aureus infection	59	3	0	0	3
hsa04610	Complement and coagulation cascades	69	5	0	0	5
hsa05310	Asthma	34	0	0	0	0
hsa00232	Caffeine metabolism	5	0	0	0	0
hsa05330	Allograft rejection	41	0	0	0	0
hsa05332	Graft-versus-host disease	45	0	0	0	0
hsa00472	D-Arginine and D-ornithine metabolism	1	0	0	0	0

## Sheet: TableJ
Table J. Recoding in 87 squid ORFs that encode voltage and neurotransmitter gated ion channels, ion transporters, synaptic release machinery and molecular motors. In the GFL tissue, 47 out of the 87 proteins (54%) are heavily edited (defined as proteins for which the cumulative recoding level, i.e. the editing level summed over all recoding sites, exceeds unity), more than 2-fold higher than expe…
Swiss-Prot name	Gene details	Number of recoding sites in GFL tissue	Cumulative recoding levels
			GFL	OL	VL	BG	SG
SCN9A_HUMAN	Sodium channel protein type 9 subunit alpha	142	35.9	15.7	12.9	25.2	27.7
KCNA1_HUMAN	Potassium voltage-gated channel subfamily A member 1	61	30.2	18.8	10.9	20.8	23.6
GRIK2_HUMAN	Glutamate receptor ionotropic, kainate 2	63	24.8	26.7	18.4	16.6	14.9
CAC1B_HUMAN	Voltage-dependent N-type calcium channel subunit alpha-1B	54	18.3	10.7	6.5	11.8	18.2
GRIA2_HUMAN	Glutamate receptor 2	25	14.2	15.3	8.1	13.6	14.1
SCN2A_HUMAN	Sodium channel protein type 2 subunit alpha	49	13.3	8.2	5.5	9.5	11.2
KCNB2_HUMAN	Potassium voltage-gated channel subfamily B member 2	22	12.9	10.9	5.3	9.6	10.3
KCNC1_HUMAN	Potassium voltage-gated channel subfamily C member 1	19	11.2	10.8	7.7	10.1	9.8
CA2D3_HUMAN	Voltage-dependent calcium channel subunit alpha-2/delta-3	142	11.1	5.2	2.7	7.8	9.4
DYHC1_HUMAN	Cytoplasmic dynein 1 heavy chain 1	90	10.5	6.5	5	9	10.4
DYH6_HUMAN	Dynein heavy chain 6, axonemal	31	9.7	0	1	2	2.7
SYT1_HUMAN	Synaptotagmin-1	37	9	7	3.8	6.9	7.9
CACB2_HUMAN	Voltage-dependent L-type calcium channel subunit beta-2	98	8.9	4.5	1.7	5.9	7.4
GRIA4_HUMAN	Glutamate receptor 4	23	8	7.1	2.9	5.3	6.5
CCG7_HUMAN	Voltage-dependent calcium channel gamma-7 subunit	12	8	5.9	5.1	6.8	6.6
SYT2_HUMAN	Synaptotagmin-2	25	7	6.7	5.3	6.4	6.5
NCKX1_HUMAN	Sodium/potassium/calcium exchanger 1	16	6.7	6.8	7.7	6.4	6.6
KCND2_HUMAN	Potassium voltage-gated channel subfamily D member 2	19	6.5	6.2	4.6	5.7	5.1
CAC1D_HUMAN	Voltage-dependent L-type calcium channel subunit alpha-1D	8	6.3	3.9	3.4	4.7	5.7
KIF5C_HUMAN	Kinesin heavy chain isoform 5C	35	5.9	3.3	1.7	4.3	5.3
SYN2_HUMAN	Synapsin-2	29	5.7	3.4	2.5	4.6	5
CA2D2_HUMAN	Voltage-dependent calcium channel subunit alpha-2/delta-2	17	5.5	3.1	1.9	3.3	4.2
GRD2I_HUMAN	Delphilin	26	4.9	1.8	1	5.3	3.1
SL9A7_HUMAN	Sodium/hydrogen exchanger 7	27	4.8	3.2	1.7	3.7	4.4
SNP25_HUMAN	Synaptosomal-associated protein 25	7	4.4	3.4	1.9	3.6	3.8
KI13A_HUMAN	Kinesin-like protein KIF13A	13	3.8	2.9	1.3	3	2.9
S4A11_HUMAN	Sodium bicarbonate transporter-like protein 11	12	3.6	2.5	2.6	2.6	3.3
DYH1_HUMAN	Dynein heavy chain 1, axonemal	5	3.3	1.7	1.5	2.3	2.3
KI16B_HUMAN	Kinesin-like protein KIF16B	17	3.3	1.5	0.9	1.2	2.5
SYT16_HUMAN	Synaptotagmin-16	10	3	1.5	0.8	1.1	1.5
GRIK3_HUMAN	Glutamate receptor ionotropic, kainate 3	13	3	4	3.7	3.7	2
S4A10_HUMAN	Sodium-driven chloride bicarbonate exchanger	12	2.8	2.7	1.2	1.9	2.3
NAC3_HUMAN	Sodium/calcium exchanger 3	7	2.7	6	3.3	4.9	5.2
KIF3B_HUMAN	Kinesin-like protein KIF3B	9	2.4	1.3	0.7	1.7	2
SYT11_HUMAN	Synaptotagmin-11	27	2.4	3.5	3.8	2.7	2.3
KIF3A_HUMAN	Kinesin-like protein KIF3A	16	2.3	1	0.4	1.9	2.4
NCKX4_HUMAN	Sodium/potassium/calcium exchanger 4	4	2.3	2.3	1	2.2	2.6
AT1A3_HUMAN	Sodium/potassium-transporting ATPase subunit alpha-3	7	2	1.4	0.9	2	2
KI21A_HUMAN	Kinesin-like protein KIF21A	10	1.9	1.7	1	1.2	2
KIF2A_HUMAN	Kinesin-like protein KIF2A	9	1.9	0.7	0	0.4	1.7
SL9A2_HUMAN	Sodium/hydrogen exchanger 2	22	1.6	0.8	0.2	1	1.3
NMDZ1_HUMAN	Glutamate receptor ionotropic, NMDA 1	6	1.5	3.8	0.9	3.6	2.9
SYT6_HUMAN	Synaptotagmin-6	2	1.5	1.1	0.8	0.3	0.8
DYHC2_HUMAN	Cytoplasmic dynein 2 heavy chain 1	2	1.5	1	0	0.7	0
KI13B_HUMAN	Kinesin-like protein KIF13B	5	1.1	0.9	0.5	0.8	1
STX1A_HUMAN	Syntaxin-1A	1	1	0.9	1	1	1
SL9A5_HUMAN	Sodium/hydrogen exchanger 5	1	1	0	0	0	0
DC1I2_HUMAN	Cytoplasmic dynein 1 intermediate chain 2	17	0.9	0.3	0.1	0.5	0.8
DYH7_HUMAN	Dynein heavy chain 7, axonemal	1	0.7	0.1	0	0	0
DYH2_HUMAN	Dynein heavy chain 2, axonemal	1	0.7	1	0	1	1
SYT7_HUMAN	Synaptotagmin-7	6	0.5	0.8	0.5	0.8	0.9
DC1L2_HUMAN	Cytoplasmic dynein 1 light intermediate chain 2	21	0.4	0.5	0.1	0.3	0.3
KI18A_HUMAN	Kinesin-like protein KIF18A	1	0.4	0	0	0	0
CAC1G_HUMAN	Voltage-dependent T-type calcium channel subunit alpha-1G	1	0.3	4.6	2.4	4.5	3.4
SYT17_HUMAN	Synaptotagmin-17	1	0.3	3.5	2.9	3.1	1.3
STX17_HUMAN	Syntaxin-17	4	0.3	0.1	0.1	0.2	0.3
NMD3A_HUMAN	Glutamate receptor ionotropic, NMDA 3A	1	0.1	0.8	0	1.7	1.6
STX16_HUMAN	Syntaxin-16	1	0.1	0	0	0	0.2
STX6_HUMAN	Syntaxin-6	1	0.1	0	0	0.1	0.1
STX12_HUMAN	Syntaxin-12	4	0	0	0	0	0
STX5_HUMAN	Syntaxin-5	2	0	0	0	0	0
S4A7_HUMAN	Sodium bicarbonate cotransporter 3	0	0	0	0	0	0
KIF11_HUMAN	Kinesin-like protein KIF11	0	0	0	0	0	0
SYT9_HUMAN	Synaptotagmin-9	0	0	0.2	0	0.1	0
SYT15_HUMAN	Synaptotagmin-15	0	0	0	0	0	0
SL9B1_HUMAN	Sodium/hydrogen exchanger 9B1	0	0	0.2	0	0	0
DNAI1_HUMAN	Dynein intermediate chain 1, axonemal	0	0	0.3	0.1	0.1	0.3
DYH12_HUMAN	Dynein heavy chain 12, axonemal	0	0	0	0	0	0
STX18_HUMAN	Syntaxin-18	0	0	0	0	0	0
KI20B_HUMAN	Kinesin-like protein KIF20B	0	0	0	0	0	0
S4A4_HUMAN	Electrogenic sodium bicarbonate cotransporter 1	0	0	0	0	0	0
GRIA3_HUMAN	Glutamate receptor 3	0	0	2.7	2.7	0	0
NMDE2_HUMAN	Glutamate receptor ionotropic, NMDA 2B	0	0	0.4	0	0.1	0.1
VAMP1_HUMAN	Vesicle-associated membrane protein 1	0	0	0	0	0	0
CAC1C_HUMAN	Voltage-dependent L-type calcium channel subunit alpha-1C	0	0	0	0	0	0
KCNC3_HUMAN	Potassium voltage-gated channel subfamily C member 3	0	0	0	0	0	0
TPC1_HUMAN	Two pore calcium channel protein 1	0	0	0	0	0	0
NCKX5_HUMAN	Sodium/potassium/calcium exchanger 5	0	0	0	0	0	0
KIF15_HUMAN	Kinesin-like protein KIF15	0	0	0	0	0	0
NCKX2_HUMAN	Sodium/potassium/calcium exchanger 2	0	0	0	0	0	0
NAC2_HUMAN	Sodium/calcium exchanger 2	0	0	0.1	0	0.1	0.1
GRIA1_HUMAN	Glutamate receptor 1	0	0	1	0	0.5	0.5
DYL2_HUMAN	Dynein light chain 2, cytoplasmic	0	0	0	0	0	0
S4A8_HUMAN	Electroneutral sodium bicarbonate exchanger 1	0	0	0	0	0	0
CAC1S_HUMAN	Voltage-dependent L-type calcium channel subunit alpha-1S	0	0	0	0	0	0
SL9A8_HUMAN	Sodium/hydrogen exchanger 8	0	0	0	0	0	0
NCKX3_HUMAN	Sodium/potassium/calcium exchanger 3	0	0	0	0	0	0
