# Supplementary figures and images for: The majority of transcripts in the squid nervous system are extensively recoded by A-to-I RNA editing
Source: eLife journal article supplement (doi:10.7554/elife.05198), 2015-01-08

a

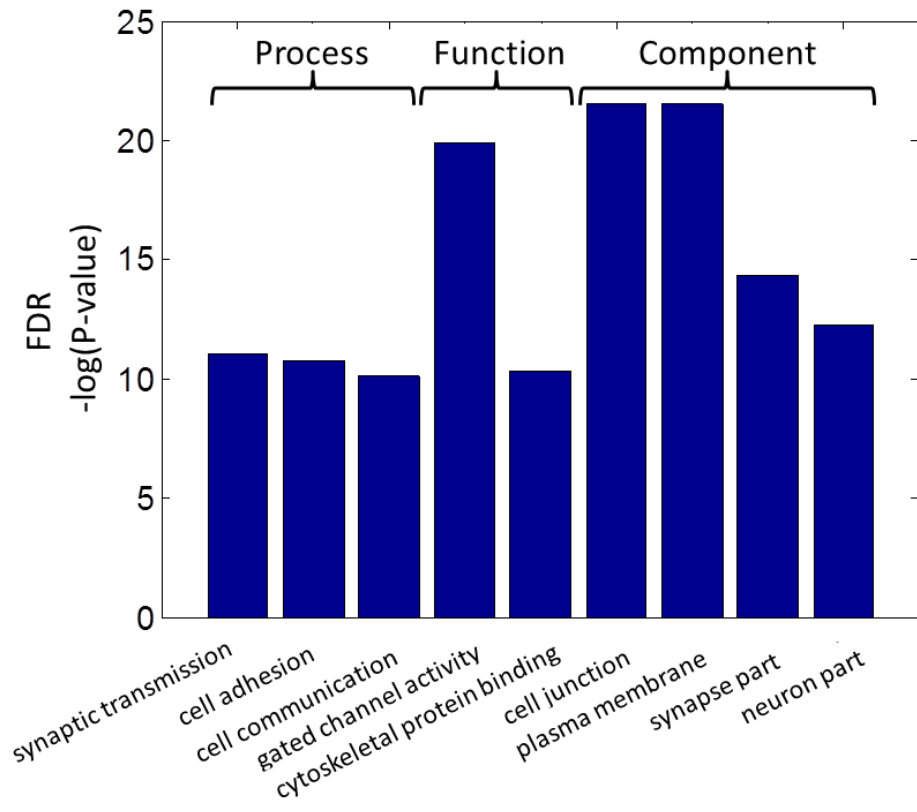

b

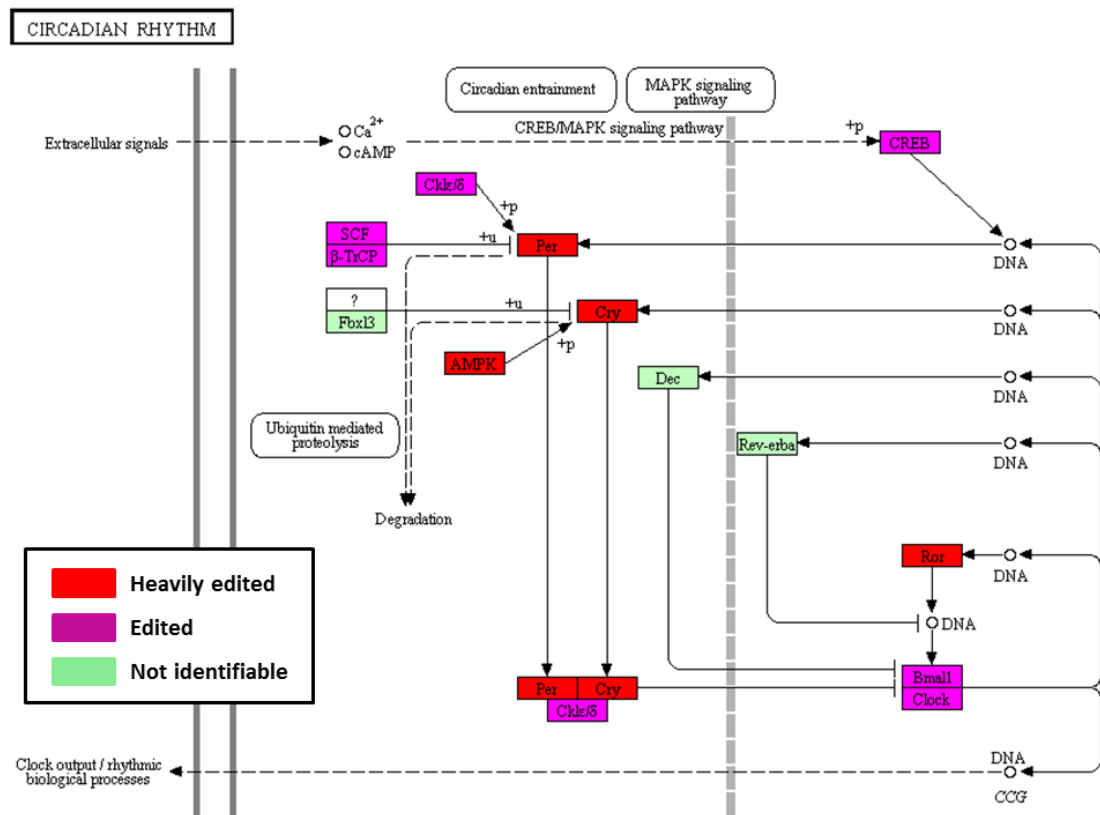

Supplement: supp [file elife-05198-supp-v1.zip]

**a**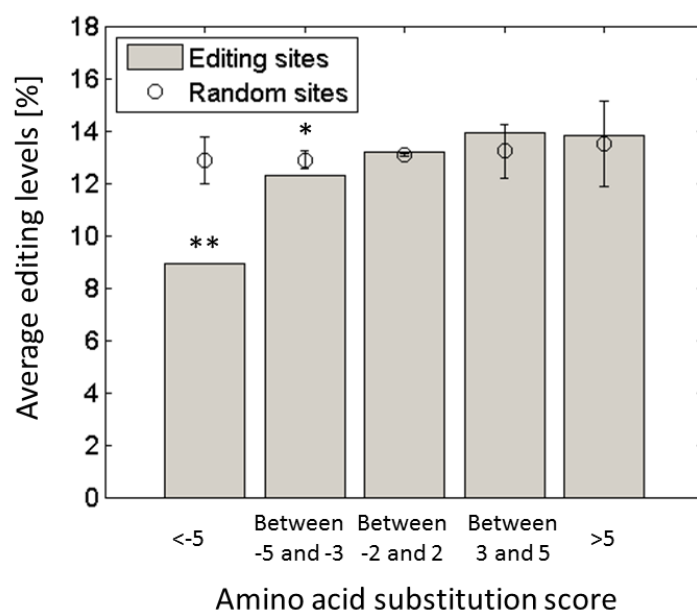**b**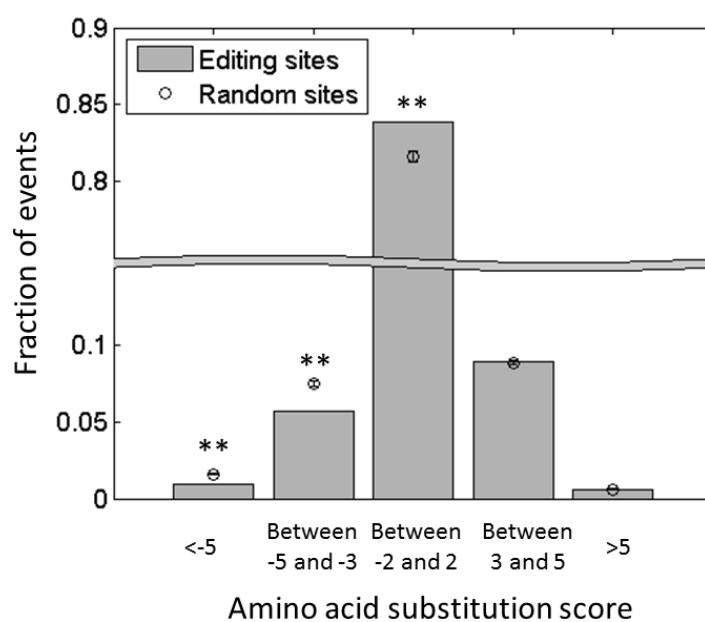**c**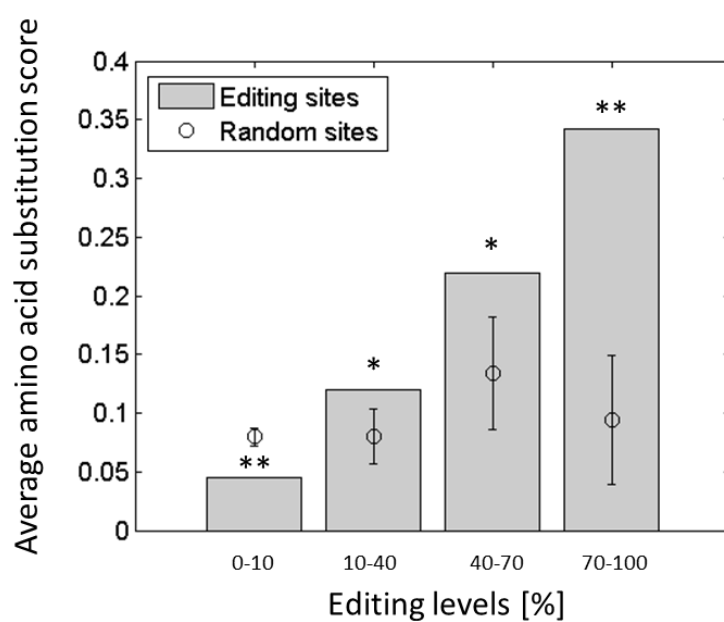

Supplement: supp [file elife-05198-supp-v1.zip]

**a**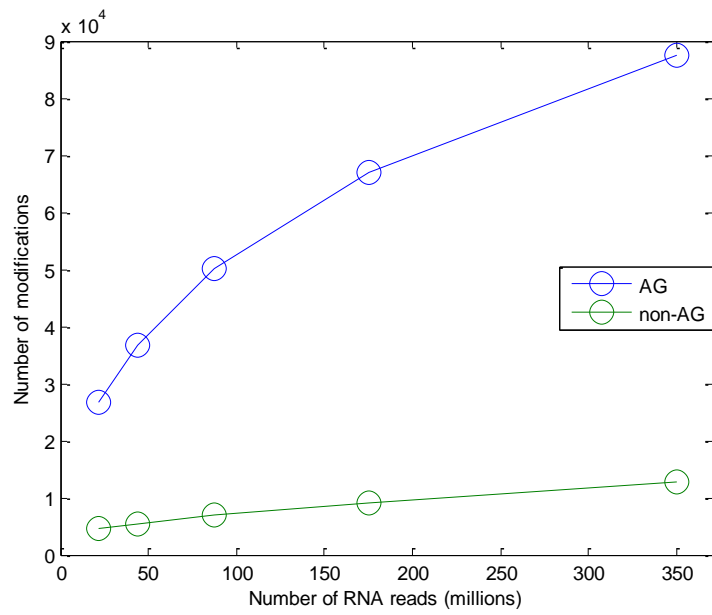**b**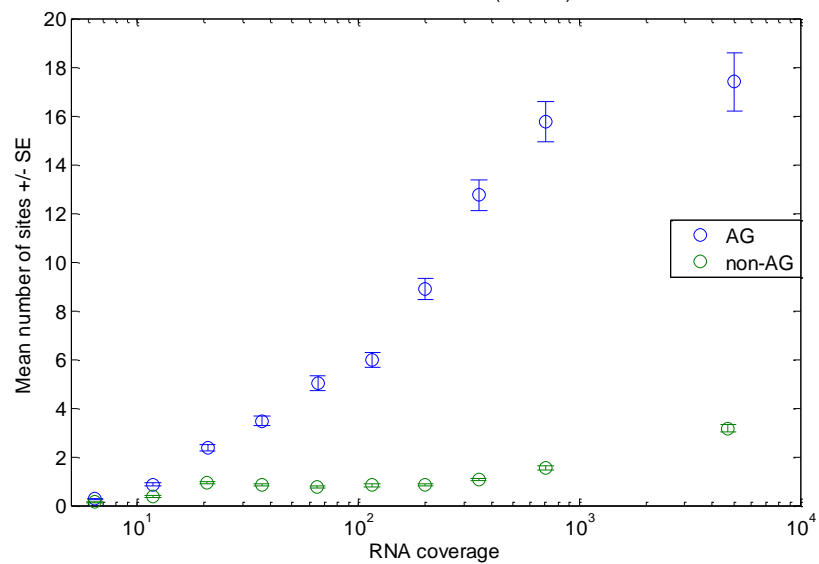**c**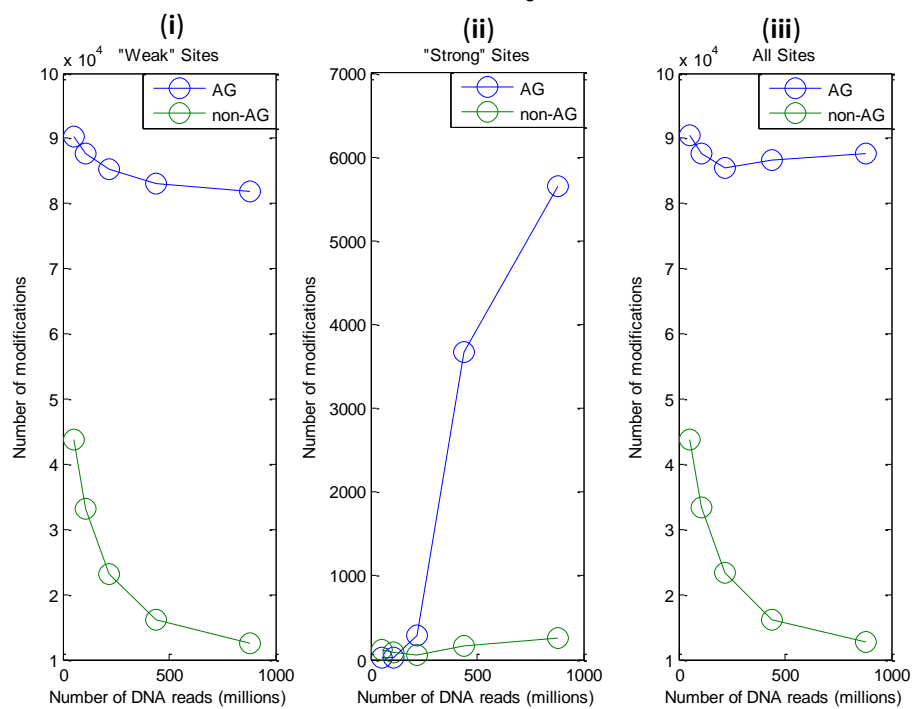

Supplement: supp [file elife-05198-supp-v1.zip]

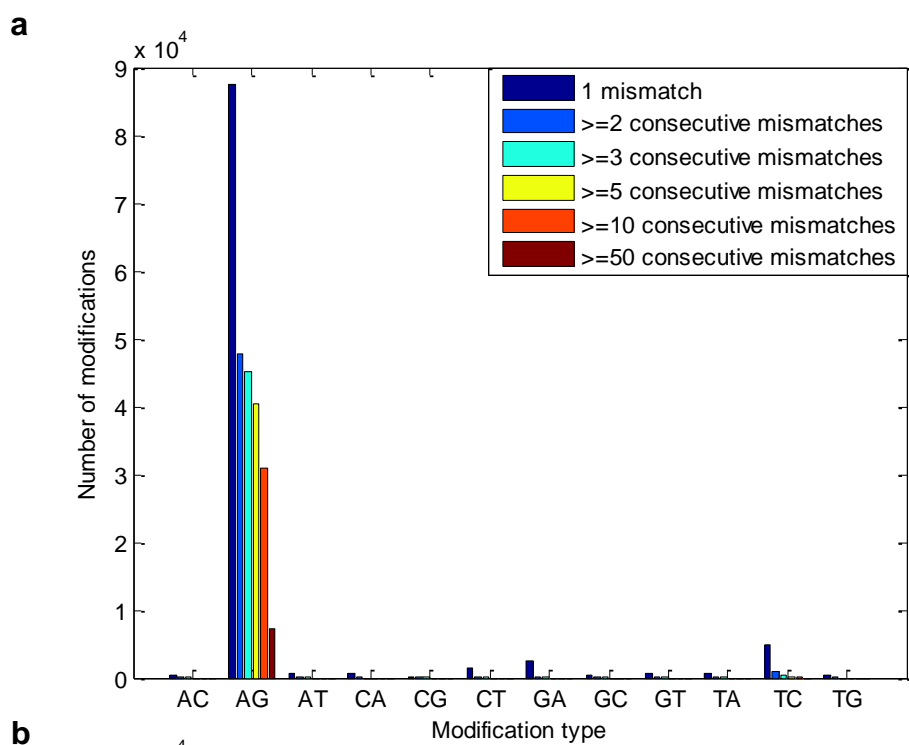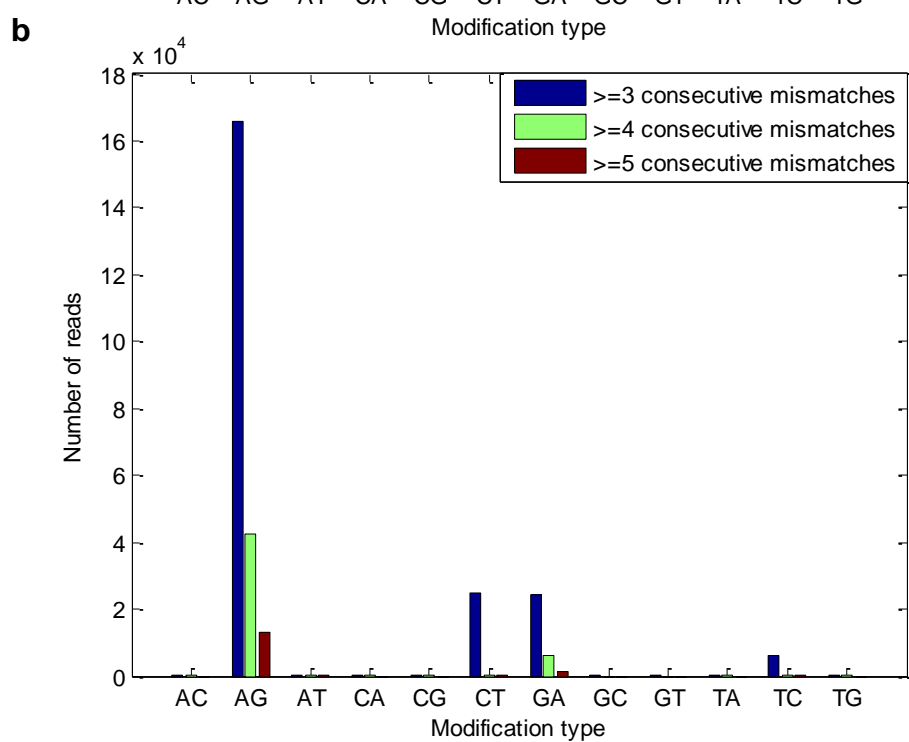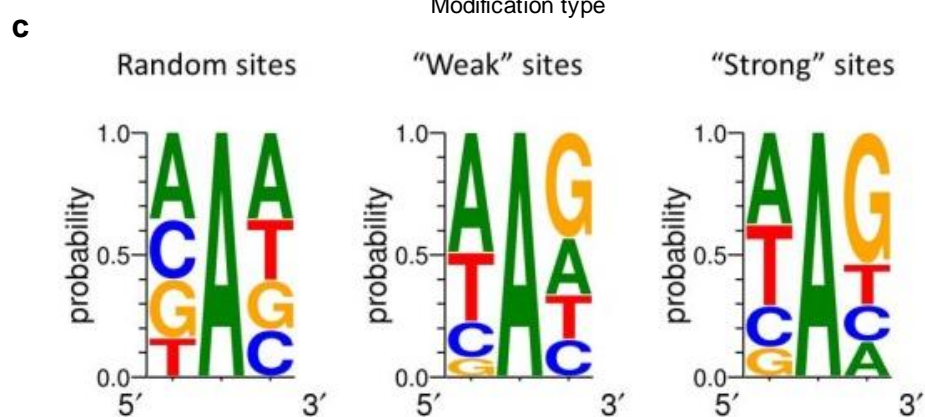

Supplement: supp [file elife-05198-supp-v1.zip › elife_poa_e05198_Figure_2_figure_supplement_1.pdf]

**a**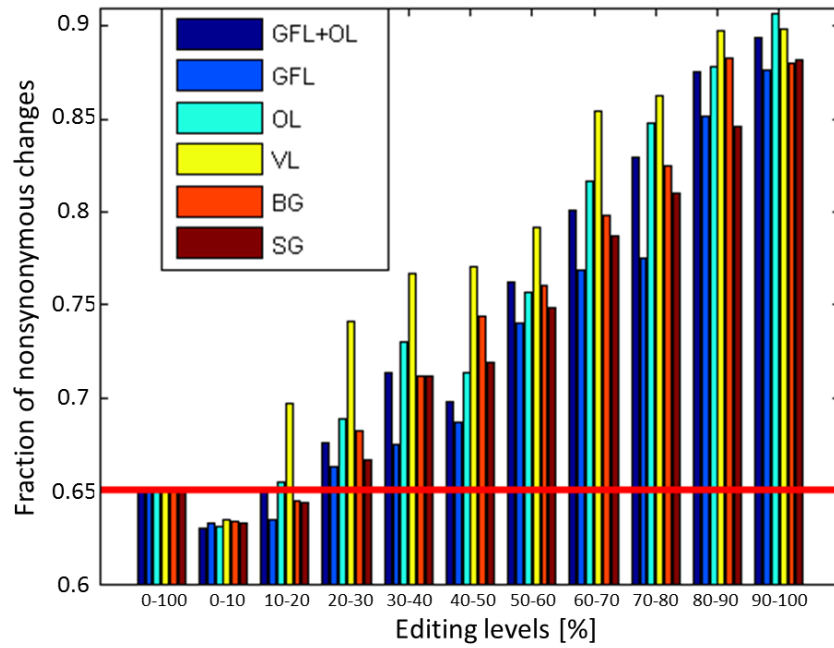**b**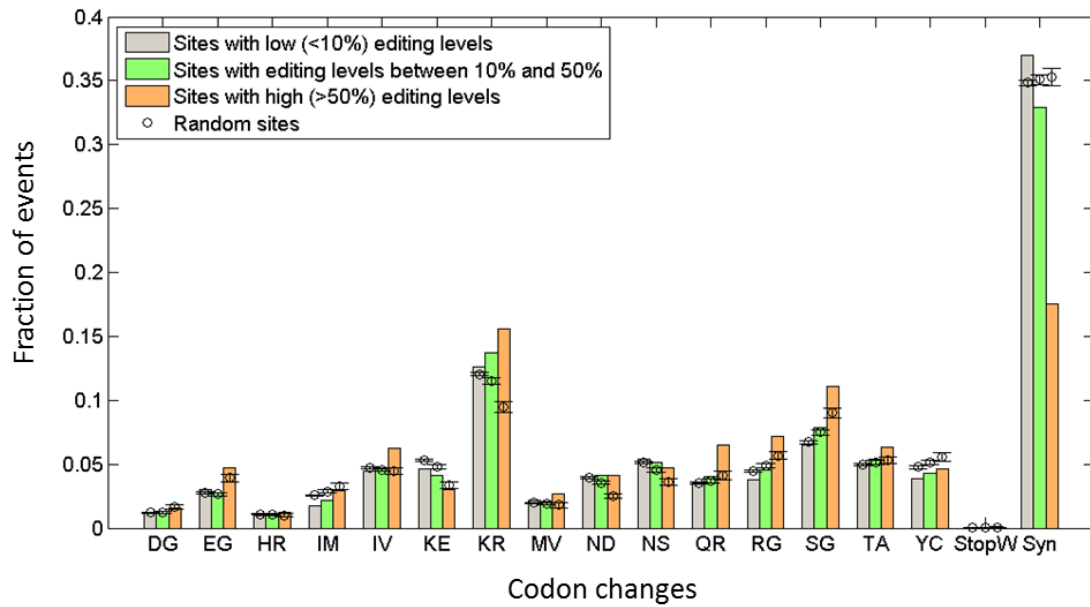**c**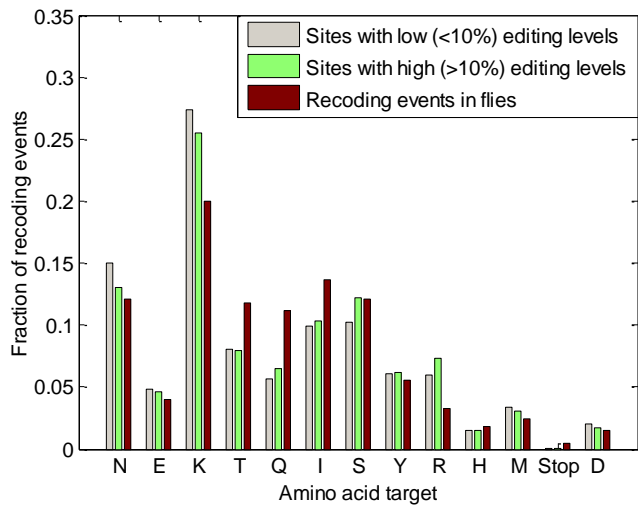**d**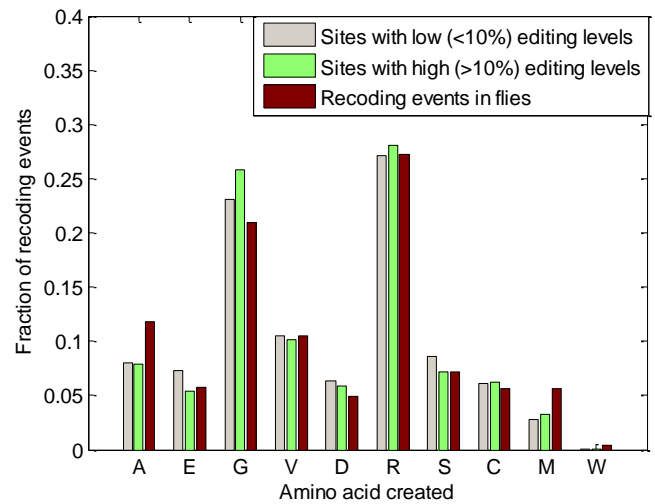

Supplement: supp [file elife-05198-supp-v1.zip › elife_poa_e05198_Figure_4_figure_supplement_2.pdf]

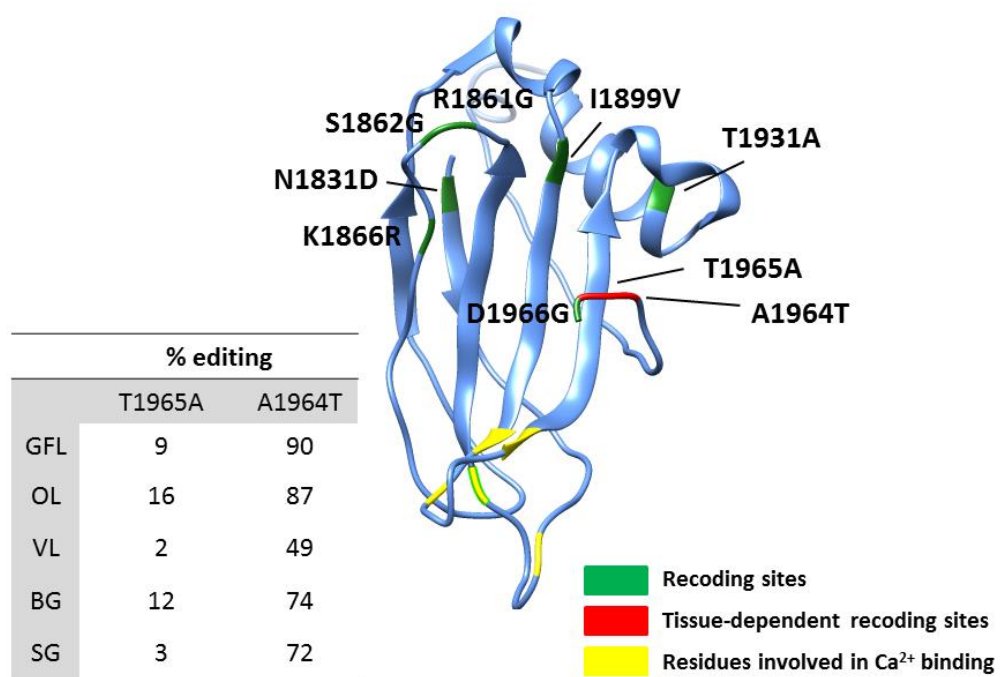

|     | % editing |        |
|-----|-----------|--------|
|     | T1965A    | A1964T |
| GFL | 9         | 90     |
| OL  | 16        | 87     |
| VL  | 2         | 49     |
| BG  | 12        | 74     |
| SG  | 3         | 72     |

Supplement: supp [file elife-05198-supp-v1.zip › elife_poa_e05198_Figure_3_figure_supplement_1.pdf]

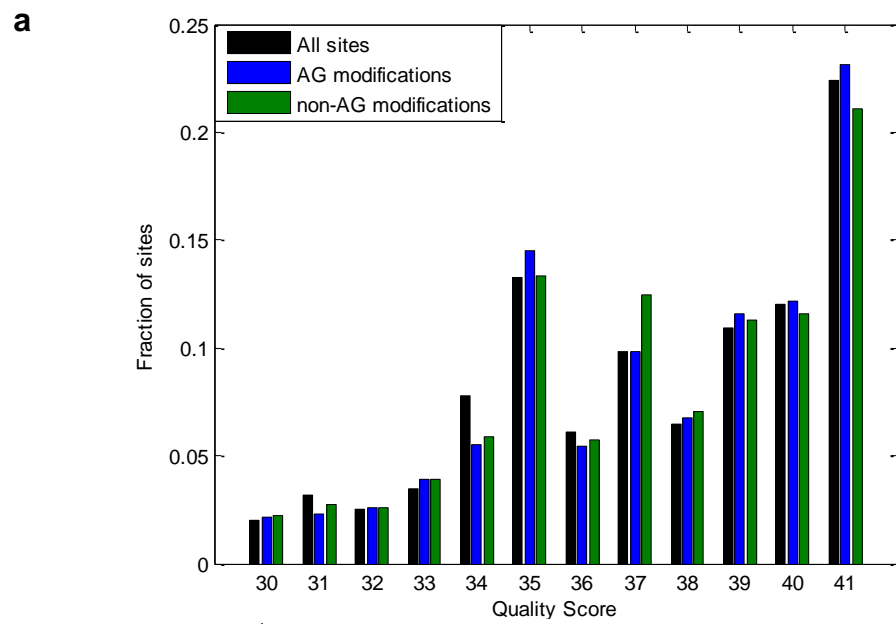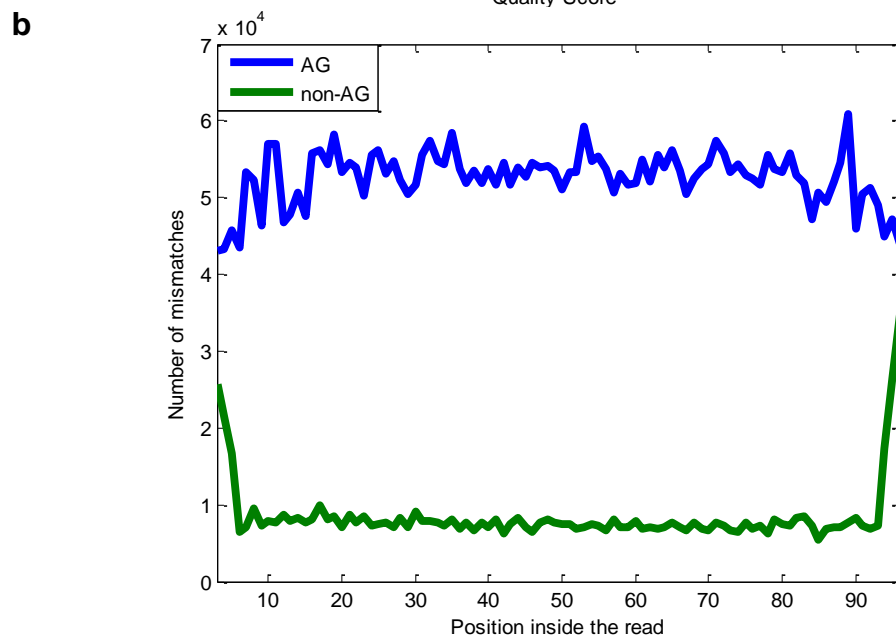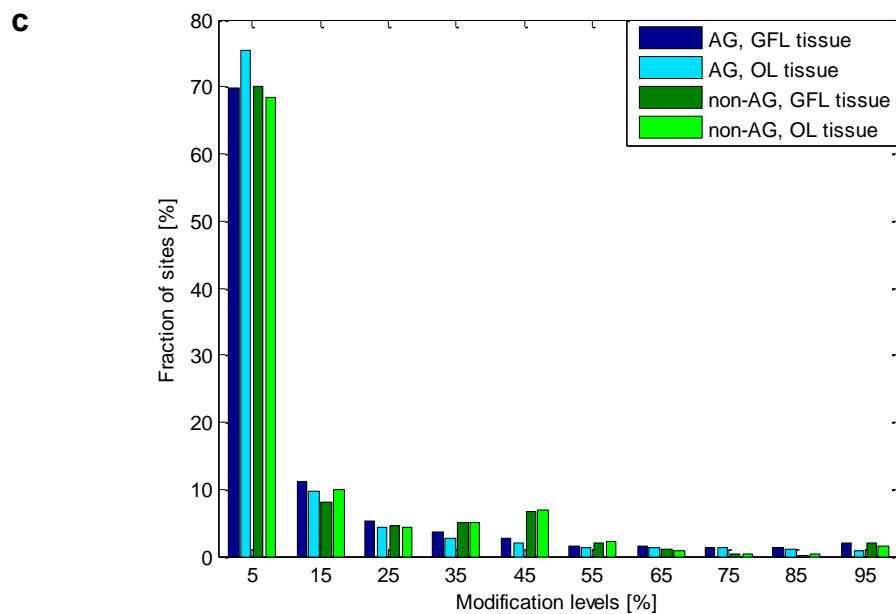

Supplement: supp [file elife-05198-supp-v1.zip › elife_poa_e05198_Figure_2_figure_supplement_4.pdf]

**a**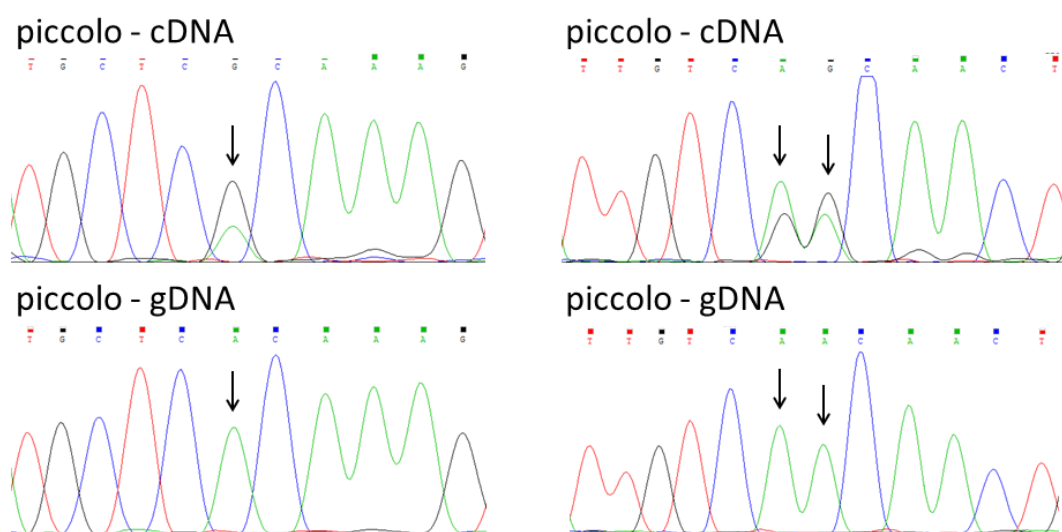**b**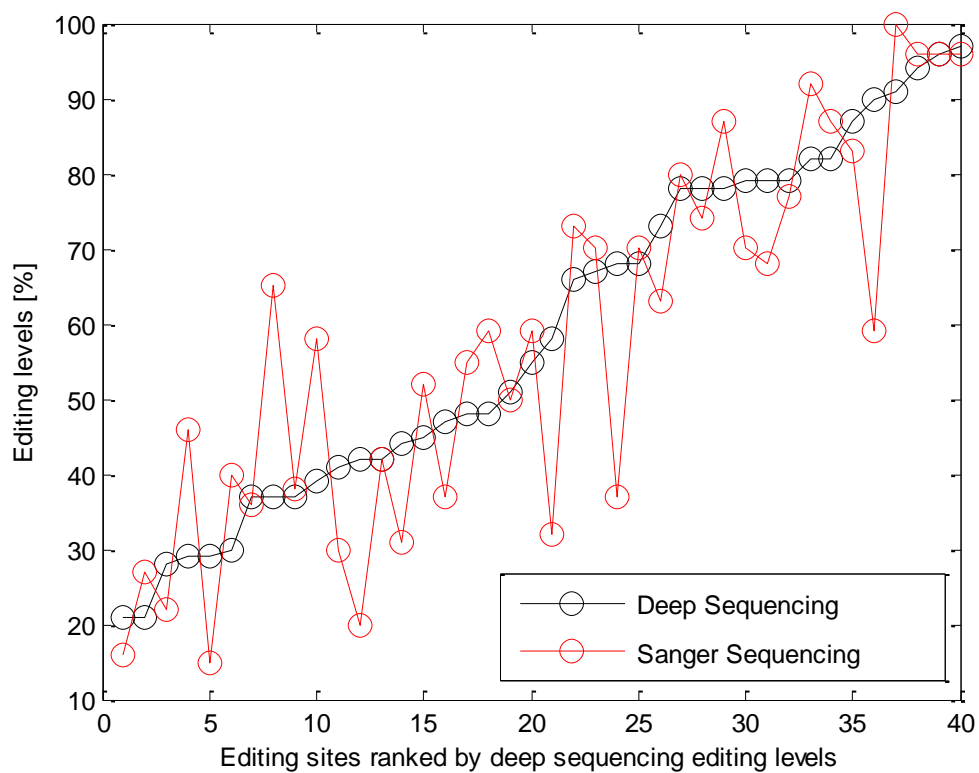

Supplement: supp [file elife-05198-supp-v1.zip › elife_poa_e05198_Figure_2_figure_supplement_3.pdf]
